# Supplementary material for: Calculation of electric field gradients in Cd(ii) model complexes of the CueR protein metal site
Source: Royal Society of Chemistry journal article supplement (doi:10.1039/d2cp05574k), 2023-01-01
Supplement: d2cp05574k1.pdf [file d2cp05574k1.pdf]

# Supporting information

## Table of Contents

|                                                                                                                   |    |
|-------------------------------------------------------------------------------------------------------------------|----|
| <b>Example of input files for small model system</b> .....                                                        | 2  |
| Structure 1 with HBandHLYP functional, and a locally dense combination of the basis sets QZ4P, TZ2P and DZP:..... | 2  |
| Structure 2 with HBandHLYP functional, and a locally dense combination of the basis sets QZ4P, TZ2P and DZP:..... | 4  |
| Structure 3 with HBandHLYP functional, and a locally dense combination of the basis sets QZ4P, TZ2P and DZP:..... | 5  |
| Structure 4 with HBandHLYP functional, and a locally dense combination of the basis sets QZ4P, TZ2P and DZP:..... | 7  |
| Structure 5 with HBandHLYP functional, and a locally dense combination of the basis sets QZ4P, TZ2P and DZP:..... | 9  |
| Structure 6 with HBandHLYP functional, and a locally dense combination of the basis sets QZ4P, TZ2P and DZP:..... | 12 |
| Structure 7 with HBandHLYP functional, and a locally dense combination of the basis sets QZ4P, TZ2P and DZP:..... | 14 |
| <b>Example of input files for large model system</b> .....                                                        | 16 |
| Structure 1 with HBandHLYP functional, and a locally dense combination of the basis sets QZ4P, TZ2P and DZP:..... | 16 |
| Structure 2 with HBandHLYP functional, and a locally dense combination of the basis sets QZ4P, TZ2P and DZP:..... | 20 |
| Structure 3 with HBandHLYP functional, and a locally dense combination of the basis sets QZ4P, TZ2P and DZP:..... | 25 |
| Structure 4 with HBandHLYP functional, and a locally dense combination of the basis sets QZ4P, TZ2P and DZP:..... | 29 |
| Structure 5 with HBandHLYP functional, and a locally dense combination of the basis sets QZ4P, TZ2P and DZP:..... | 33 |
| Structure 6 with HBandHLYP functional, and a locally dense combination of the basis sets QZ4P, TZ2P and DZP:..... | 37 |
| Structure 7 with HBandHLYP functional, and a locally dense combination of the basis sets QZ4P, TZ2P and DZP:..... | 42 |
| <b>111Cd V<sub>zz</sub> and <math>\eta</math> for the small model</b> .....                                       | 46 |
| <b>111Cd V<sub>zz</sub> and <math>\eta</math> for the large model</b> .....                                       | 50 |
| <b>Bond length and angle for the small model system</b> .....                                                     | 52 |
| <b>Structure 1</b> .....                                                                                          | 52 |

|                          |    |
|--------------------------|----|
| <b>Structure 2</b> ..... | 53 |
| <b>Structure 3</b> ..... | 54 |
| <b>Structure 4</b> ..... | 54 |
| <b>Structure 5</b> ..... | 55 |
| <b>Structure 6</b> ..... | 56 |
| <b>Structure 7</b> ..... | 56 |

## Example of input files for small model system

Structure 1 with HBandHLYP functional, and a locally dense combination of the basis sets QZ4P, TZ2P and DZP:

\$AMSBIN/ams <<eor

System  
atoms

|    |             |             |             |
|----|-------------|-------------|-------------|
| Cd | 0.00000000  | 0.00000000  | 0.00000000  |
| C  | 0.00000000  | 0.00000000  | 3.73505939  |
| S  | 1.11073907  | 0.00000000  | 2.25813240  |
| C  | -2.09897131 | -1.72235683 | -2.28248921 |
| S  | -0.51656264 | -0.83728367 | -2.19705366 |
| C  | 3.28454244  | -0.51367097 | -1.26517557 |
| O  | 2.68057970  | 0.15906085  | -0.45925529 |
| C  | 1.59430961  | 2.84431269  | -0.88434308 |
| O  | 0.72372314  | 2.49049666  | -0.10925697 |
| N  | 2.76878430  | 3.42724499  | -0.43360860 |
| H  | 0.40442242  | 0.79024465  | 4.37823633  |
| H  | -0.47590642 | 0.74121093  | 3.12758970  |
| H  | -2.97195791 | -1.01680177 | -2.34880530 |
| H  | -2.11276955 | -2.12865122 | -3.32176235 |
| H  | 3.49494154  | 3.72107377  | -1.09838042 |
| H  | 1.44272158  | 3.00290627  | -1.93161053 |
| H  | 3.08794567  | 3.21210596  | 0.48934927  |
| H  | -0.07577403 | -0.95556336 | 4.21051387  |
| H  | -2.26065455 | -2.48636997 | -1.55102325 |
| N  | 4.51822804  | -0.18726565 | -1.99481889 |
| H  | 4.81705331  | -0.98529847 | -2.51812291 |
| H  | 4.98736921  | 0.46771644  | -1.79258322 |
| H  | 2.87731797  | -1.39205508 | -1.72070776 |

end  
end

Task SinglePoint

Engine ADF

title Structure 1 t479 step10000 small spin-orbit ZORA

basis

PerAtomType  
core None  
type ZORA/QZ4P  
Symbol Cd

end

PerAtomType  
core None  
type ZORA/QZ4P  
Symbol S

end

PerAtomType  
core None  
type ZORA/DZP  
Symbol N

end

PerAtomType  
core None  
type ZORA/QZ4P  
Symbol O

end

PerAtomType  
core None  
type ZORA/TZ2P  
Symbol C

end

PerAtomType  
core None  
type ZORA/DZP  
Symbol H

end

end

numericalquality verygood

symmetry nosym

relativity

level spin-orbit  
formalism ZORA

end

save TAPE10

xc

hybrid BHandHLYP

end

NUCLEARMODEL gaussian  
QTENS

EndEngine  
eor

Structure 2 with HBandHLYP functional, and a locally dense combination of the basis sets  
QZ4P, TZ2P and DZP:  
\$AMSBIN/ams <<eor

System

atoms

|    |             |             |             |
|----|-------------|-------------|-------------|
| Cd | 0.00000000  | 0.00000000  | 0.00000000  |
| C  | 0.00000000  | 0.00000000  | 3.49761130  |
| S  | 1.22646584  | 0.00000000  | 2.11753239  |
| C  | -1.69513494 | -2.54621089 | -1.85978151 |
| S  | -1.73368164 | -0.70396016 | -1.41262011 |
| C  | 2.82771104  | -0.40947822 | -1.86639394 |
| O  | 2.13400366  | 0.18329479  | -1.12217105 |
| H  | 0.23603535  | 0.97929655  | 4.00920782  |
| H  | -1.05096799 | 0.00843125  | 3.10922821  |
| H  | -2.51071232 | -2.64862394 | -2.57597377 |
| H  | -0.68912023 | -2.78298723 | -2.34507942 |
| N  | 4.07608533  | 0.11180972  | -2.44147699 |
| H  | 4.48126913  | -0.57907832 | -3.04022552 |
| H  | 4.23705717  | 1.03910932  | -2.10353687 |
| H  | -1.82743937 | -3.14500016 | -0.98294233 |
| H  | 0.25909266  | -0.80342305 | 4.15509316  |
| H  | 2.53538196  | -1.39844982 | -2.15166381 |

end  
end

Task SinglePoint  
Engine ADF

Title Structure 2 t480 step10000 small spin-orbit ZORA

basis

PerAtomType

core None

type ZORA/QZ4P

Symbol Cd

end

PerAtomType

```

core None
type ZORA/QZ4P
Symbol S
end
PerAtomType
core None
type ZORA/DZP
Symbol N
end
PerAtomType
core None
type ZORA/QZ4P
Symbol O
end
PerAtomType
core None
type ZORA/TZ2P
Symbol C
end
PerAtomType
core None
type ZORA/DZP
Symbol H
end
end

```

```

numericalquality verygood
symmetry nosym
relativity
level spin-orbit
formalism ZORA
end
save TAPE10
xc
hybrid BHandHLYP
end
NUCLEARMODEL gaussian
QTENS
EndEngine
eor

```

Structure 3 with HBandHLYP functional, and a locally dense combination of the basis sets QZ4P, TZ2P and DZP:  
 \$AMSBIN/ams <<eor

System  
atoms

|    |             |             |             |
|----|-------------|-------------|-------------|
| Cd | 0.00000000  | 0.00000000  | 0.00000000  |
| C  | 0.00000000  | 0.00000000  | 3.67151254  |
| S  | 1.23684272  | 0.00000000  | 2.21869338  |
| C  | -1.89620072 | -2.61250042 | -1.54030846 |
| S  | -1.74157906 | -0.76565991 | -1.44636652 |
| C  | 2.66343291  | -1.24703114 | -1.80031321 |
| O  | 2.07484453  | -0.25583512 | -1.39896508 |
| C  | 1.49497467  | 2.59745234  | -1.52507685 |
| O  | 0.64559683  | 2.01395985  | -0.87664292 |
| N  | 2.83966797  | 2.64049675  | -1.03628565 |
| H  | 0.09731910  | 1.02153077  | 4.14891435  |
| H  | -1.04532577 | -0.17473322 | 3.35914584  |
| H  | -2.81130704 | -2.71098074 | -2.16233969 |
| H  | -0.99620262 | -3.06514294 | -1.92080873 |
| H  | 2.99067160  | 2.04792716  | -0.24504663 |
| H  | 3.72845971  | -1.07102171 | -2.04300625 |
| H  | -2.11091341 | -3.07577590 | -0.60000304 |
| H  | 0.19040271  | -0.72776936 | 4.43243210  |
| H  | 3.46315351  | 3.24579796  | -1.53113537 |
| H  | 1.28202861  | 3.09817871  | -2.44639495 |
| N  | 2.03783025  | -2.57598571 | -1.85863174 |
| H  | 1.10105702  | -2.51886248 | -1.51338853 |
| H  | 2.69088369  | -3.23580889 | -2.23032323 |

end  
end

Task SinglePoint

Engine ADF

Title Structure 3 t482 step10000 small spin-orbit ZORA

basis

PerAtomType

core None

type ZORA/QZ4P

Symbol Cd

end

PerAtomType

core None

type ZORA/QZ4P

Symbol S

end

PerAtomType

```
core None
type ZORA/DZP
Symbol N
end
PerAtomType
core None
type ZORA/QZ4P
Symbol O
end
PerAtomType
core None
type ZORA/TZ2P
Symbol C
end
PerAtomType
core None
type ZORA/DZP
Symbol H
end
end
```

```
numericalquality verygood
symmetry nosym
```

```
relativity
level spin-orbit
formalism ZORA
end
save TAPE10
xc
hybrid BHandHLYP
end
```

```
NUCLEARMODEL gaussian
QTENS
```

```
EndEngine
eor
```

Structure 4 with HBandHLYP functional, and a locally dense combination of the basis sets QZ4P, TZ2P and DZP:  
\$AMSBIN/ams <<eor

```
System
atoms
```

|    |             |             |             |
|----|-------------|-------------|-------------|
| Cd | 0.00000000  | 0.00000000  | 0.00000000  |
| C  | 0.00000000  | 0.00000000  | 3.73505939  |
| S  | 1.11073907  | 0.00000000  | 2.25813240  |
| C  | -2.09897131 | -1.72235683 | -2.28248921 |
| S  | -0.51656264 | -0.83728367 | -2.19705366 |
| C  | 3.28454244  | -0.51367097 | -1.26517557 |
| O  | 2.68057970  | 0.15906085  | -0.45925529 |
| C  | 1.59430961  | 2.84431269  | -0.88434308 |
| O  | 0.72372314  | 2.49049666  | -0.10925697 |
| N  | 2.76878430  | 3.42724499  | -0.43360860 |
| H  | 0.40442242  | 0.79024465  | 4.37823633  |
| H  | -0.47590642 | 0.74121093  | 3.12758970  |
| H  | -2.97195791 | -1.01680177 | -2.34880530 |
| H  | -2.11276955 | -2.12865122 | -3.32176235 |
| H  | 3.49494154  | 3.72107377  | -1.09838042 |
| H  | 1.44272158  | 3.00290627  | -1.93161053 |
| H  | 3.08794567  | 3.21210596  | 0.48934927  |
| H  | -0.07577403 | -0.95556336 | 4.21051387  |
| H  | -2.26065455 | -2.48636997 | -1.55102325 |
| N  | 4.51822804  | -0.18726565 | -1.99481889 |
| H  | 4.81705331  | -0.98529847 | -2.51812291 |
| H  | 4.98736921  | 0.46771644  | -1.79258322 |
| H  | 2.87731797  | -1.39205508 | -1.72070776 |

end  
end

Task SinglePoint

Engine ADF

title t482 step10000 small spin-orbit ZORA

basis

PerAtomType

core None

type ZORA/QZ4P

Symbol Cd

end

PerAtomType

core None

type ZORA/QZ4P

Symbol S

end

PerAtomType

core None

type ZORA/DZP



```
Symbol N
end
PerAtomType
core None
type ZORA/QZ4P
Symbol O
end
PerAtomType
core None
type ZORA/TZ2P
Symbol C
end
PerAtomType
core None
type ZORA/DZP
Symbol H
end
end
```

numericalquality verygood

symmetry nosym

```
relativity
level spin-orbit
formalism ZORA
end
```

save TAPE10

```
xc
hybrid BHandHLYP
end
```

NUCLEARMODEL gaussian

QTENS

EndEngine

eor

Structure 5 with HBandHLYP functional, and a locally dense combination of the basis sets QZ4P, TZ2P and DZP:  
\$AMSBIN/ams <<eor

System

atoms

|    |             |             |             |
|----|-------------|-------------|-------------|
| Cd | 0.00000000  | 0.00000000  | 0.00000000  |
| C  | 0.00000000  | 0.00000000  | 3.35848764  |
| S  | 1.24584318  | 0.00000000  | 2.07840457  |
| C  | -2.14890533 | 1.19956578  | -2.39816173 |
| S  | -1.88770129 | -0.19548680 | -1.18756801 |
| C  | 1.48648648  | 3.22053201  | -0.35459524 |
| O  | 1.13313722  | 2.08436175  | -0.23748292 |
| N  | 2.70991945  | 3.72675491  | -0.72093352 |
| C  | 1.30478510  | -3.03074356 | -1.40102809 |
| O  | 1.41660471  | -1.89707172 | -0.91488280 |
| N  | 1.29093174  | -4.21087914 | -0.67958243 |
| H  | -0.74581932 | -0.83176383 | 3.26484918  |
| H  | 0.77580078  | -0.26288104 | 4.12856145  |
| H  | -1.20524794 | 1.27112646  | -3.06514391 |
| H  | -3.00786219 | 0.94589464  | -2.95217930 |
| H  | 2.79097990  | 4.79275424  | -0.79592951 |
| H  | 1.18107346  | -5.05170161 | -1.20962841 |
| H  | 1.30618484  | -3.13364463 | -2.46606771 |
| H  | 3.44134762  | 3.24370836  | -1.20226383 |
| H  | 0.76917334  | 3.97886415  | -0.11944793 |
| H  | -0.49763250 | 0.89736551  | 3.66179778  |
| H  | -2.33523043 | 2.16501988  | -1.97616489 |
| H  | 1.43204052  | -4.21791105 | 0.31038668  |

end

end

Task SinglePoint

Engine ADF

title t483 step7000 small spin-orbit ZORA

basis

PerAtomType

core None

type ZORA/QZ4P

Symbol Cd

end

PerAtomType

core None

type ZORA/QZ4P

Symbol S

end

```
PerAtomType
  core None
  type ZORA/DZP
  Symbol N
end
PerAtomType
  core None
  type ZORA/QZ4P
  Symbol O
end
PerAtomType
  core None
  type ZORA/TZ2P
  Symbol C
end
PerAtomType
  core None
  type ZORA/DZP
  Symbol H
end
end
```

numericalquality verygood

symmetry nosym

```
relativity
  level spin-orbit
  formalism ZORA
end
```

save TAPE10

```
xc
  hybrid BHandHLYP
end
```

NUCLEARMODEL gaussian

QTENS

EndEngine

eor

Structure 6 with HBandHLYP functional, and a locally dense combination of the basis sets QZ4P, TZ2P and DZP:  
\$AMSBIN/ams <<eor

```
System
atoms
Cd      0.00000000  0.00000000  0.00000000
C       0.00000000  0.00000000  3.23916863
S       1.35541681  0.00000000  1.98065071
C      -2.07637286  1.47793489 -2.21698264
S      -2.12631096  0.03767796 -1.10562796
C       2.17557528  2.35030478 -0.96804745
O       1.52194398  1.36123322 -1.27614987
N       3.51295548  2.43562213 -1.18415938
C      -1.34101343 -3.71920072 -0.79056241
O      -0.67898254 -2.68306429 -0.51602626
N      -1.76220419 -4.64340864  0.13658758
H      -0.85819448 -0.57393404  2.88085355
H       0.31392835 -0.64521130  4.07288899
H      -1.37434816  1.26084732 -3.09170112
H      -3.07055200  1.55135195 -2.59413938
H       4.04342311  3.12188200 -0.66883581
H      -2.49442767 -5.24123354 -0.30325489
H      -1.90496808  2.46342972 -1.83708746
H       1.79543329  3.27786978 -0.59386132
H       4.09902491  1.83046539 -1.72296169
H      -1.49050373 -4.10031870 -1.77914813
H      -0.27028772  0.93907388  3.67504105
H      -1.73116194 -4.59490310  1.13492799
end
end
```

Task SinglePoint

Engine ADF

title t483 step10000 small spin-orbit ZORA

```
basis
  PerAtomType
  core None
  type ZORA/QZ4P
  Symbol Cd
end
PerAtomType
  core None
```

type ZORA/QZ4P  
Symbol S

end

PerAtomType

core None

type ZORA/DZP

Symbol N

end

PerAtomType

core None

type ZORA/QZ4P

Symbol O

end

PerAtomType

core None

type ZORA/TZ2P

Symbol C

end

PerAtomType

core None

type ZORA/DZP

Symbol H

end

end

numericalquality verygood

symmetry nosym

relativity

level spin-orbit

formalism ZORA

end

save TAPE10

xc

hybrid BHandHLYP

end

NUCLEARMODEL gaussian

QTENS

EndEngine

eor

Structure 7 with HBandHLYP functional, and a locally dense combination of the basis sets QZ4P, TZ2P and DZP:

\$AMSBIN/ams <<eor

System

atoms

|    |             |             |             |
|----|-------------|-------------|-------------|
| Cd | 0.00000000  | 0.00000000  | 0.00000000  |
| C  | 0.00000000  | 0.00000000  | 3.34955344  |
| O  | 0.55833902  | 0.00000000  | 2.26312380  |
| C  | 2.07672960  | -2.44358244 | 1.23467238  |
| O  | 1.65952283  | -1.69884646 | 0.38377056  |
| N  | 3.18309703  | -2.18404648 | 1.96929595  |
| H  | 3.49989422  | -2.92019562 | 2.60396080  |
| C  | 1.52468111  | 1.90617629  | -2.40766339 |
| S  | 1.77809649  | 1.67365128  | -0.52074584 |
| H  | 2.46211159  | 1.61395503  | -2.89955214 |
| H  | 0.77058924  | 1.24274265  | -2.74919716 |
| C  | -3.22581227 | -0.92072477 | 0.45980042  |
| S  | -1.84185181 | -1.31583435 | -0.62565396 |
| H  | -3.99922366 | -1.68823472 | 0.32337525  |
| H  | -3.02774382 | -0.91518565 | 1.58887430  |
| O  | -1.30700075 | 2.22597952  | -0.05745454 |
| H  | -1.29594222 | 2.38240339  | -0.99324338 |
| H  | -1.47801036 | 3.07307612  | 0.22177087  |
| H  | -3.58008564 | 0.01861583  | 0.08962528  |
| H  | 1.30701311  | 2.92528489  | -2.65043552 |
| H  | 3.83216698  | -1.43145183 | 1.85834784  |
| H  | 1.72263290  | -3.42644221 | 1.46597782  |
| N  | 0.82500049  | -0.17328427 | 4.55381534  |
| H  | 0.54134734  | -0.19972491 | 5.53445334  |
| H  | 1.82750192  | -0.28372741 | 4.39380815  |
| H  | -1.04291543 | 0.22864058  | 3.41991613  |

end

end

Task SinglePoint

Engine ADF

title t682 step12000 small spin-orbit ZORA

basis

PerAtomType

core None

```
type ZORA/QZ4P
Symbol Cd
end
PerAtomType
core None
type ZORA/QZ4P
Symbol S
end
PerAtomType
core None
type ZORA/DZP
Symbol N
end
PerAtomType
core None
type ZORA/QZ4P
Symbol O
end
PerAtomType
core None
type ZORA/TZ2P
Symbol C
end
PerAtomType
core None
type ZORA/DZP
Symbol H
end
end
```

numericalquality verygood

symmetry nosym

```
relativity
level spin-orbit
formalism ZORA
end
```

save TAPE10

```
xc
hybrid BHandHLYP
end
```

NUCLEARMODEL gaussian

QTENS

EndEngine

eor

## Example of input files for large model system

Structure 1 with HBandHLYP functional, and a locally dense combination of the basis sets QZ4P, TZ2P and DZP:

!/bin/bash

\$AMSBIN/ams <<eor

System

atoms

|    |              |             |             |
|----|--------------|-------------|-------------|
| Cd | -14.32111401 | 13.66765794 | -0.43349291 |
| N  | -12.48399891 | 18.62699857 | 0.65699996  |
| C  | -13.62059489 | 19.16674759 | -0.04271364 |
| C  | -13.80051977 | 18.58008552 | -1.43006547 |
| O  | -14.64829097 | 19.02660790 | -2.19822306 |
| C  | -13.56014557 | 20.68509873 | -0.06475369 |
| O  | -12.85146622 | 21.15191842 | 1.03377362  |
| H  | -11.67188576 | 19.05662253 | 0.28311641  |
| H  | -14.59469568 | 18.92788377 | 0.51065550  |
| H  | -14.55171434 | 21.16021390 | -0.16184557 |
| H  | -13.07800274 | 20.96789327 | -1.06116562 |
| H  | -11.97130630 | 21.44531289 | 0.75708105  |
| N  | -9.51499938  | 15.38599878 | -2.10199982 |
| C  | -10.43855648 | 14.82335050 | -1.12779342 |
| C  | -11.72811910 | 14.67037564 | -2.03113000 |
| O  | -12.91969586 | 14.78242663 | -1.65432692 |
| C  | -10.69219579 | 15.79291009 | 0.15243776  |
| C  | -11.55397331 | 14.94531049 | 1.16168956  |
| C  | -9.41216554  | 16.23619693 | 0.85746345  |
| H  | -9.71913919  | 16.41771096 | -2.16141282 |
| H  | -10.13791330 | 13.78131674 | -0.74802708 |
| H  | -11.31280513 | 16.70175837 | -0.06567258 |
| H  | -11.02412048 | 14.66819232 | 2.06536260  |
| H  | -12.30861169 | 15.60198479 | 1.54133487  |
| H  | -11.88228798 | 14.03714903 | 0.71174716  |
| H  | -9.61705183  | 17.01082340 | 1.59673378  |
| H  | -8.72162153  | 15.52923882 | 1.30393022  |
| H  | -8.76218223  | 16.85752936 | 0.21540648  |



|   |              |             |             |
|---|--------------|-------------|-------------|
| N | -11.55593165 | 14.41298217 | -3.37539535 |
| C | -12.71964153 | 14.12955614 | -4.21086004 |
| C | -12.26764664 | 13.31974804 | -5.41580402 |
| O | -13.02716445 | 12.49510501 | -5.94675131 |
| C | -13.38152731 | 15.42794487 | -4.70444593 |
| C | -14.84844050 | 15.41276894 | -4.85018836 |
| C | -15.37455576 | 14.69717638 | -6.11196651 |
| C | -15.80626435 | 13.25299100 | -5.87268588 |
| N | -17.05524406 | 13.16149010 | -5.04893083 |
| H | -10.67991751 | 14.46278187 | -3.82674620 |
| H | -13.44359375 | 13.42666077 | -3.57467217 |
| H | -12.93836248 | 15.70081520 | -5.66175346 |
| H | -13.05748058 | 16.22058865 | -4.02442139 |
| H | -15.05720917 | 16.49520189 | -4.87252164 |
| H | -15.34252430 | 15.03787468 | -3.96414850 |
| H | -14.72273799 | 14.55897935 | -6.90120500 |
| H | -16.25051726 | 15.23990333 | -6.52234823 |
| H | -15.11879677 | 12.60441459 | -5.24525201 |
| H | -16.05348511 | 12.67481325 | -6.81973490 |
| H | -17.94772706 | 13.49372346 | -5.46559007 |
| H | -17.23576610 | 12.15553401 | -4.64097989 |
| H | -16.96494205 | 13.82440223 | -4.13250909 |
| N | -18.88464755 | 10.74431720 | -0.26213216 |
| C | -17.70408083 | 11.45184994 | -0.66120099 |
| C | -18.27898230 | 12.28010030 | -1.81430930 |
| O | -18.06230272 | 11.98409837 | -3.02165510 |
| C | -16.42178004 | 10.73321282 | -1.16247416 |
| S | -14.95252678 | 11.80119548 | -1.75809458 |
| H | -19.25816081 | 10.10439362 | -0.93467329 |
| H | -17.43616761 | 12.14608215 | 0.17503439  |
| H | -16.60970824 | 9.97190627  | -1.97182142 |
| H | -16.02972865 | 10.15874833 | -0.26525289 |
| N | -19.17211194 | 13.33194035 | -1.49017334 |
| C | -19.80133071 | 14.30100916 | -2.49448916 |
| C | -18.64476300 | 15.12717300 | -3.10482336 |
| O | -18.30114756 | 15.07314110 | -4.28927265 |
| C | -20.71064018 | 15.18980148 | -1.67953408 |
| C | -20.32233520 | 14.98733173 | -0.26209365 |
| C | -19.71006727 | 13.59620314 | -0.16117096 |
| H | -20.38355159 | 13.79063555 | -3.39514594 |
| H | -21.72491523 | 14.86372599 | -1.79143434 |
| H | -20.70515089 | 16.19642713 | -1.99805424 |
| H | -21.30596800 | 15.24252371 | 0.29413317  |
| H | -19.51959634 | 15.74186192 | 0.08577649  |
| H | -19.01907400 | 13.60146320 | 0.62357812  |
| H | -20.49815963 | 12.84547658 | 0.20309873  |

|   |              |             |             |
|---|--------------|-------------|-------------|
| N | -17.93779949 | 15.99432086 | -2.27477806 |
| C | -17.28420959 | 17.19123874 | -2.86722083 |
| H | -17.99999872 | 15.85499902 | -1.24999965 |
| H | -18.07021165 | 17.99066064 | -2.79775393 |
| H | -16.79822700 | 17.04663145 | -3.89077009 |
| C | -16.17302106 | 16.82403594 | 5.07776810  |
| O | -17.39716972 | 16.83750911 | 4.95837344  |
| N | -15.22797800 | 16.38201675 | 4.09385641  |
| C | -15.63787245 | 15.69217919 | 2.92668803  |
| C | -15.06399450 | 14.31451203 | 3.05325728  |
| O | -13.82049657 | 14.25455781 | 2.95036990  |
| C | -14.97261342 | 16.36428011 | 1.64082905  |
| S | -15.58606036 | 15.55484081 | 0.17656827  |
| H | -14.33277139 | 16.14876338 | 4.31954438  |
| H | -16.77650293 | 15.75401011 | 2.83852298  |
| H | -13.89000039 | 16.41504062 | 1.59380531  |
| H | -15.28756055 | 17.43412640 | 1.57024379  |
| N | -15.91638729 | 13.32655786 | 3.37218127  |
| C | -15.67938971 | 11.87848578 | 3.67447486  |
| C | -14.90194586 | 11.03944432 | 2.65212161  |
| O | -15.48204614 | 10.34331474 | 1.84321586  |
| C | -17.02204266 | 11.15450045 | 3.86241626  |
| C | -18.11599860 | 12.21999928 | 3.58999957  |
| C | -17.40967165 | 13.54371855 | 3.11329861  |
| H | -15.04755986 | 11.83342357 | 4.55091239  |
| H | -17.17429322 | 10.58704758 | 4.88873201  |
| H | -17.13031707 | 10.19658147 | 3.18438585  |
| H | -18.71202115 | 12.45408244 | 4.58257453  |
| H | -18.77862487 | 11.91777272 | 2.78759860  |
| H | -17.54066557 | 13.70462020 | 2.02223945  |
| H | -17.74065786 | 14.27942214 | 3.80272381  |
| N | -13.54134277 | 11.09319040 | 2.81915700  |
| C | -12.48589794 | 10.25992418 | 2.24431618  |
| C | -11.60233118 | 9.86334238  | 3.40520004  |
| O | -10.78285667 | 8.98035347  | 3.13724331  |
| C | -11.62369492 | 11.19928101 | 1.26866819  |
| C | -11.05749193 | 10.31758433 | -0.01761762 |
| C | -10.33280131 | 11.71721283 | 1.89132601  |
| C | -11.27890382 | 11.09742265 | -1.27290995 |
| H | -13.16889750 | 12.00856016 | 3.08072550  |
| H | -12.89562370 | 9.45915765  | 1.67604772  |
| H | -12.21046189 | 12.07800086 | 0.95532357  |
| H | -11.67790558 | 9.43049985  | 0.01341227  |
| H | -10.10294768 | 9.91840568  | 0.26969130  |
| H | -10.42086489 | 12.03887068 | 2.88892285  |
| H | -9.54935379  | 10.97472634 | 1.91968442  |

```
H      -9.91559932  12.53547105  1.32064601
H     -11.00153048  12.19009620 -1.20752525
H     -10.70255455  10.68371382 -2.14492996
H     -12.34743346  10.79601207 -1.48370698
O     -18.28996592   8.63845641  0.92329935
H     -17.37499860   8.67321536  1.31048048
H     -18.60977859   7.89362805  1.49509516
O     -18.79899863  16.52999894  2.57999977
H     -19.35629139  16.09839147  3.13856292
H     -18.63189009  17.47070330  2.67957610
H     -15.69339888  17.29769855  5.92989947
H     -16.47871866  17.50639587 -2.13752349
H     -13.13809898  17.79829860 -1.87710004
H     -11.74499924  10.39409925  4.35159987
H     -12.59252067  18.89839653  1.60058855
H     -8.56502956  15.29123512 -1.90253310
H     -18.74353802  10.31472546  0.66780293
H     -11.27659909  13.48069889 -5.87739980
end
end
```

Task SinglePoint

Engine ADF

Title Structure 1 t479 s12000 spin-orbit ZORA

```
basis
  PerAtomType
  core None
  type ZORA/QZ4P
  Symbol Cd
end
  PerAtomType
  core None
  type ZORA/QZ4P
  Symbol S
end
  PerAtomType
  core None
  type ZORA/QZ4P
  Symbol O
end
  PerAtomType
  core None
  type ZORA/QZ4P
```

```
Symbol N
end
PerAtomType
core None
type ZORA/TZ2P
Symbol C
end
PerAtomType
core None
type ZORA/DZP
Symbol H
end
end
```

numericalquality verygood

symmetry nosym

```
relativity
level spin-orbit
formalism ZORA
end
```

save TAPE10

```
xc
hybrid BHandHLYP
end
```

NUCLEARMODEL gaussian

QTENS

EndEngine

eor

Structure 2 with HBandHLYP functional, and a locally dense combination of the basis sets QZ4P, TZ2P and DZP:  
\$AMSBIN/ams <<eor

```
System
atoms
Cd 76.626229937405724968 21.459777297672001595 78.044063048158719198
N 72.716777438463637395 19.188405530888982042 81.718238758524350374
```

C 74.029798910614999841 19.689653725578398991 81.359738705929501634  
C 74.543246719872058748 20.826972185478055621 82.339567950438691923  
O 73.741463635217286310 21.695305020658427253 82.621037901244235968  
C 73.970250184693455253 20.287454880022362858 79.994631300699111875  
S 75.136747105022863025 21.718338747800689958 79.968315834674470466  
N 75.771572481625057094 20.935205102885710460 82.924105375965055487  
C 76.191022788372166019 21.978430057751960902 83.887484642750223429  
C 76.564516547206807218 23.345262362484852758 83.319123854500304560  
O 75.702589274271645081 23.995452699197123536 82.776642834349019040  
C 77.363507036075830570 21.283032728415040680 84.725145841210149911  
C 77.733721187211344272 20.063844387030044913 83.905559436930786887  
C 76.926969331061954449 20.088964543007158170 82.582989226129683402  
N 80.288040831170803813 17.724921642744138950 79.012817952710875602  
C 79.099552556781432600 18.440266695882993275 78.478544366245941433  
C 78.095286597304337306 17.468443042238448015 77.921884020539337712  
O 78.155156719324466508 17.099953567862343107 76.731363279462371452  
C 79.513046172383582189 19.435734297958571659 77.423578051965563418  
S 77.984373835072062775 20.202567960370558353 76.604765521302667253  
N 77.076755509885487072 17.069962615973775399 78.714287348593202864  
C 76.042094578553133033 16.127983111837789210 78.245826156514553418  
C 74.931290271473301345 16.952445221251039698 77.438510550359325180  
O 73.780861917797977867 17.182684553258830817 77.781801405408785399  
C 75.499308010690285187 15.532480514048861764 79.605513667954170387  
C 75.845989176531517728 16.476997735851568905 80.698987785896221681  
C 76.816689068214202507 17.516436537745146751 80.112896871486711348  
N 75.467716331233035021 17.458748452562872444 76.259469530097689471  
C 74.669502563943439100 17.726195061496586192 75.011734173606328113  
C 75.398571970840748691 17.078255282555097949 73.892310568412298721  
O 74.821777609119550334 16.697338612236841016 72.946373351904014726  
C 74.499527846252519225 19.271369690648487705 74.766554200317386858  
C 73.760790063484890311 19.862843536233356190 75.996578241715340596  
C 73.806873045189234972 19.664642564494847932 73.430856024217632694  
C 74.067639778038696363 21.358291874971001789 76.148745487344541516  
N 80.769987809440166870 23.409996203102462431 78.224988026841828059  
C 79.806599127437195307 23.150249764963593435 79.283274015590720296  
C 78.580216331473906166 24.107345909983578736 78.949251478328974940  
O 77.566629966053199041 23.614966068826163337 78.607663628334876194  
C 80.254626646227720244 23.530336050218611632 80.671725635519294428  
O 80.178948013813283069 22.457583133294278355 81.637591038313033209  
N 77.696988026159402807 25.192996067219496581 74.810989255171747914  
C 76.454367061753160328 24.852990191856335400 74.099809031156681272  
C 75.293709683704548752 24.685791662995356432 75.155108485275647467  
O 74.107820225471314757 24.420774712229714964 74.894409952874440251  
C 76.484039681509557340 23.533888786277728400 73.311190964493391675  
C 75.545758866121360597 23.609838542466693667 72.149057151729749648  
C 77.919814465947268900 23.071982132928411602 72.900906558792058831

N 75.617471435702427129 25.065265837112601588 76.447543217910904900  
C 74.581319244490686060 25.487096045984984016 77.388288162724364838  
C 73.481868434259055789 26.309151954043556998 76.714380146153615669  
O 72.406339264298352987 26.268542191326492485 77.219987456534965986  
C 75.304538821259114911 26.373529196310837364 78.417097146484920245  
C 74.418408926292457295 26.632772165678108678 79.600686778413646039  
C 74.474704179355256883 25.631100321629855188 80.718389254226352136  
C 73.315352000449877323 24.589380229243090525 80.516271605401328770  
N 73.174668925180569090 23.703563508023975714 81.693732618045274307  
H 72.116834217428177567 19.873184719384092034 82.075181531847562155  
H 74.776894851103591577 18.835436511245141844 81.394571367028078157  
H 72.974442732475267803 20.805812110723788777 79.867592998721818276  
H 74.158201937868085452 19.592213279881239174 79.136284350959229528  
H 75.411316435028112437 22.179733264930021619 84.601977178898934540  
H 76.996593355798012226 20.942481620739030745 85.704686130947735023  
H 78.238679438631237417 21.903745591583508201 84.902295140638699422  
H 77.619241342421830154 19.207316858764247769 84.531137068132650825  
H 78.824762544571711942 20.001050308554699342 83.624139641387188249  
H 77.545352555148241436 20.588964846527563424 81.820103924153102071  
H 76.684448610079073205 19.064605665608102214 82.232783182751475692  
H 80.066606287705752720 16.980169686172061461 79.634604596459354298  
H 80.885252524466736190 17.376274762676217733 78.225633236114546776  
H 78.776227692233931066 18.963826921383372337 79.359164342746737475  
H 80.043993026586505835 18.979223545700239839 76.587946775824661927  
H 80.131125111186577215 20.270925621917623261 77.896945339311471912  
H 76.372639221041367819 15.337308782780583627 77.508292701652280243  
H 76.066626589136461689 14.604064282622557513 79.809556083185867692  
H 74.432518633758448345 15.333925094764699892 79.419843334343028118  
H 76.333951722745709390 15.984433732529657490 81.533644491854559533  
H 74.974019543641901464 16.984531039612637215 81.120342958396378208  
H 76.299603667480553781 18.483723225680570579 80.113425961238476702  
H 77.740683757762781170 17.596483136074684950 80.702276336373515164  
H 76.484883232445909584 17.339928852958884420 76.120475272909203568  
H 73.652427548153639236 17.304807333113060963 75.171549377797063585  
H 75.514418867529627732 19.702504531144956701 74.730544135407583894  
H 74.049319341142847861 19.365984113230755526 76.856652052021473764  
H 72.689134365793961479 19.678148702248812185 76.009835940899009188  
H 74.433780163707410793 19.284695807549073976 72.577522666057518563  
H 72.867199963721489553 19.147658830844481059 73.229524874229639408  
H 73.606963053013302556 20.761926176266200628 73.351089219021801568  
H 74.899671019992823062 21.646345813705771377 76.794968387633019802  
H 74.226999678687647588 21.796310279928494680 75.177229027764781222  
H 73.254528831523572308 21.893845062487297781 76.679952909603628086  
H 81.624658277082147606 23.855911588739374452 78.569402655904426069  
H 79.388095174479914817 22.063336182420218989 79.230158431535514296  
H 79.529564947175217071 24.337584907848349047 81.089211568274365050

H 81.311482057629561382 23.980130319632632308 80.664605805117446380  
H 80.636751634043392301 21.675444126323174743 81.224459135368860530  
H 78.280476591043026247 24.398014910716767645 75.040911281887304085  
H 76.188525673275591998 25.720285996012655971 73.463608745315085002  
H 76.119266960904894859 22.667201929217430489 73.969803594797141955  
H 74.516883762084461296 23.456113279460122811 72.554072348548842797  
H 75.535602078580808438 24.573998957195676951 71.615804912079880751  
H 75.671412458422523173 22.776383193920075598 71.378683228782222159  
H 78.464352807810087143 22.706879847981291221 73.741506561690769672  
H 77.920242849224834458 22.356709711225221326 72.092811051976795511  
H 78.511014940735350365 23.954816758278184352 72.524936367240201207  
H 76.594346205652030335 25.178908577535001001 76.739788082746997588  
H 74.110219686542279760 24.566742194509551211 77.836511194735379604  
H 75.618333038123324741 27.305856252213928315 77.927693270651772650  
H 76.239833375843858221 25.817788070145159196 78.714393537642436627  
H 73.296703946698286813 26.767515883791777043 79.326278328254289818  
H 74.560710398587502823 27.761812296384842824 80.006385595629112117  
H 74.328720851049837393 26.055886824334482554 81.754934243912245506  
H 75.422814087865376109 25.058171021642706933 80.673433997466190704  
H 73.589674610298061452 23.947610789979350443 79.656733282397951257  
H 72.318254974321291684 25.017494015430742138 80.211663334650808110  
H 72.775693744079646308 22.739530312676674129 81.460784668365334937  
H 74.076701910954355412 23.385199244551976960 82.136862776302947964  
H 72.538439256820538503 24.131676568276571260 82.401935064452402457  
H 72.288566144157840654 18.521487285544058210 81.142312223867989474  
H 77.476088080655770796 23.743896178698765453 83.644987579235589692  
H 76.479288139020155768 17.156497683992469661 74.044189307820005297  
H 81.007434174656992809 22.549938809664428874 77.756691548040436146  
H 78.746087980069773948 25.188496065950872094 79.054087954008991801  
H 78.296209752960123751 25.850830880042501292 74.328505703399116555  
H 73.860789346429399416 26.833195942938186107 75.837489161787758007  
end  
end

Task SinglePoint

Engine ADF

Title Structure 2 t480 s10000 spin-orbit ZORA

basis  
PerAtomType  
core None  
type ZORA/QZ4P  
Symbol Cd  
end

PerAtomType  
core None  
type ZORA/QZ4P  
Symbol S  
end

PerAtomType  
core None  
type ZORA/QZ4P  
Symbol N  
end

PerAtomType  
core None  
type ZORA/QZ4P  
Symbol O  
end

PerAtomType  
core None  
type ZORA/TZ2P  
Symbol C  
end

PerAtomType  
core None  
type ZORA/DZP  
Symbol H  
end  
end

numericalquality verygood

symmetry nosym

relativity  
level spin-orbit  
formalism ZORA  
end

save TAPE10

xc  
hybrid BHandHLYP  
end

NUCLEARMODEL gaussian

QTENS



EndEngine

eor

Structure 3 with HBandHLYP functional, and a locally dense combination of the basis sets QZ4P, TZ2P and DZP:  
\$AMSBIN/ams <<eor

System

atoms

Cd 76.674584680018426752 21.555670155430945556 77.737340502027038269  
N 72.716777438463637395 19.188405530888982042 81.718238758524350374  
C 74.078421801967138549 19.582160117226933949 81.493894695009018392  
C 74.498228260605102946 20.735399498096402482 82.382587837838769929  
O 73.638663137607849762 21.463474263631297845 82.829461778839558406  
C 74.107061920679527134 20.151337489775858813 79.954473993343682992  
S 75.082569157820316263 21.771995971791305635 79.704843974641065074  
N 75.782649051008419860 20.939464362320610036 82.811570457824601021  
C 76.184459219591616375 21.955850910347141536 83.695634997786726217  
C 76.635211026859124672 23.283651853195220127 83.196729552302585375  
O 76.108483498549617252 23.877743401673956924 82.250551418621554944  
C 77.386160257705881804 21.392945894481961489 84.537527978597509559  
C 78.027989782572149124 20.369286449695270136 83.508342625789566682  
C 76.850044169405464345 20.040338691580267039 82.459170314239486288  
N 80.288040831170803813 17.724921642744138950 79.012817952710875602  
C 79.227090125102080265 18.646866444658517281 78.502306693947005556  
C 78.180891096846750088 17.669751473066398262 77.925272796543083587  
O 78.308792286533389415 17.396703343210685233 76.736172354536336115  
C 79.679278700727920182 19.636582898807809272 77.450628617012256427  
S 78.289752010827385220 20.352735359216303834 76.450681580909517265  
N 77.241971521993789906 17.088722544026428096 78.799923754470370341  
C 76.664701464296200584 15.724837053991420177 78.446910698305472920  
C 75.577110784363611629 15.842469409279935633 77.430631034533845991  
O 74.522564897407534090 15.218128409657238009 77.571586917477077350  
C 76.077993496070646984 15.279190263755726420 79.822611384450311789  
C 75.845989176531517728 16.476997735851568905 80.698987785896221681  
C 76.909300447227749942 17.456704129857122609 80.195407401818428639  
N 75.663685251324636738 16.839838969725942519 76.518744854208406991  
C 74.686164375398874427 16.917022339108349627 75.485977290907655401  
C 75.346402395706988386 17.360542280652669689 74.105422598782951127  
O 74.707527161841923657 17.697130117008910588 73.196845617194853162  
C 73.699784896265967404 17.985022334339568317 76.058274223189684449  
C 72.373745447069794068 17.898512089249067003 75.217467384706921507  
C 74.383202858699561943 19.360321720499843678 76.009146261581904014  
C 71.591210673490238037 16.658990480654438215 75.544526334106109289

N 80.769987809440166870 23.409996203102462431 78.224988026841828059  
C 79.765499826266449190 23.140404717240446786 79.240904571337750895  
C 78.736895381537522098 24.119655450745661085 78.768331842309720514  
O 77.767700710681367582 23.791537059038258661 78.102759799088346426  
C 80.166799878737606377 23.543011340693663414 80.651443083829960301  
O 80.816071294421092830 22.583820810235515353 81.335814059146457566  
N 77.696988026159402807 25.192996067219496581 74.810989255171747914  
C 76.263290126416563908 24.785196700869821740 74.568846215826994239  
C 75.837414328167284339 24.296737467122110132 75.978573000840711416  
O 75.828400054769247163 23.121820425846465241 76.297730394792367292  
C 76.107255476553788753 23.645332298684568428 73.457309452990969589  
C 74.669527471984409317 23.216795646429631006 73.237659988317332704  
C 76.599577360946284443 24.246667629640242581 72.207162682306588408  
N 75.420870418320788531 25.282029929194752782 76.929708984930158522  
C 73.996036777016215069 25.162809316033019513 77.418228138785480041  
C 73.235762486718527953 26.207885456240681776 76.515992947076256314  
O 72.095467997526782256 26.564699562297384716 76.580644541760605648  
C 73.905055912474026059 25.579203585167459067 78.865310660701680945  
C 72.581845550922224675 25.134998534234522793 79.574253347495456978  
C 72.547174283489027857 25.779111402302646638 80.999309516807031173  
C 72.353462064691768774 24.787296995003551103 82.099640346977622585  
N 73.569931852619561141 23.857939886474301971 82.148860220657738296  
H 72.022106777192533400 20.003883523801039956 81.562687585265635448  
H 74.694999457835379530 18.717782034403743552 81.660815317249600298  
H 73.040581944717175134 20.394884942712497633 79.664278003630926150  
H 74.484471929065222184 19.312195037602378989 79.342745112487477854  
H 75.428198237610757815 22.177093202932862681 84.549073980636691772  
H 76.983372460106053836 20.926021528230890567 85.481885371347971159  
H 78.047534837621768133 22.203243805705930924 84.939359753208577786  
H 78.231812091786437691 19.455706324327593393 84.029663369553333041  
H 78.852181736807580137 20.815317968991642772 83.059013665596623355  
H 77.171197035505201711 20.311070810193996294 81.412643555275124641  
H 76.638463996702341774 19.017285209495188525 82.676664230621838669  
H 80.830282570515507246 17.259171092269507852 78.252562972614967407  
H 80.899669350469338269 18.164337170859738535 79.662394785349192716  
H 78.799344082318839355 19.161260128757529486 79.429763457251183922  
H 80.214529988676360972 19.053564110401687515 76.671118552074659647  
H 80.239141637987415834 20.405352241123889456 77.955811206459685536  
H 77.484890451863776661 15.069572303870687691 78.115987284685928671  
H 76.892151895670153294 14.676729153155269714 80.324355443107577912  
H 75.175837137270434596 14.628083446383781663 79.534370144866144869  
H 75.885327460394961463 16.091454618438483237 81.710578910228520044  
H 74.813683407472225895 16.977035500484653596 80.634472008253780473  
H 76.416835011418541512 18.439696467027019366 80.095108113431564334  
H 77.768049692515376137 17.595581954043804984 80.853746402240361135  
H 76.508274301221447899 17.346274519019228677 76.425398824305943890

H 74.160518426786069313 15.952015546275788438 75.217675314803031483  
H 73.400202889872190326 17.683059637741678216 77.100724806771111730  
H 72.595628213166719434 17.985120482631462124 74.144806187104435935  
H 71.747803619458267121 18.781736935604573802 75.500914602657516639  
H 74.493697329657351247 19.678882678062141309 74.984496509467476244  
H 73.702446628647805937 20.106585353758998025 76.369144626830674838  
H 75.364394835405519757 19.406263684400901326 76.410422126561130085  
H 71.651852627096914716 16.257559995511627449 76.543924419048764207  
H 70.516919732557923339 16.929790021624352647 75.519014077877798741  
H 71.742654338098461153 15.823170396591708098 74.837562517199017975  
H 81.723699465866815217 23.567896292134150826 78.609837424599504629  
H 79.495661932250570203 22.067798873181899921 79.168345958284064068  
H 79.211015475116141715 23.670119964494638509 81.167494968693745250  
H 80.828372250685717404 24.376950024461329747 80.712308294344254023  
H 80.331493305268864447 22.357253853980861180 82.198891412435685311  
H 78.309914705485113018 24.446671210982604094 74.521448756824753445  
H 75.708553026068486247 25.731572757545201569 74.388722429310263351  
H 76.730037831978265217 22.786329896533967343 73.770008144080378543  
H 74.563264236445675692 22.731995521813352923 72.230972328537092153  
H 74.292348097299580445 22.488450121940484649 73.993693996945665958  
H 73.958860955125501846 24.044171989775563247 73.317615986877342493  
H 77.615070313266926405 24.593833918522022941 72.234832396180053138  
H 76.406469740616032027 23.593321180715065566 71.337324513834417417  
H 76.000076929002460702 25.184675464020791935 71.988257825343040963  
H 76.063765027098710902 25.349797191805418350 77.770104407195503882  
H 73.414415245797243870 24.165391980735957844 77.326563685520596891  
H 73.975833097810962613 26.722294148035700800 78.872332393040153420  
H 74.706502963792630112 25.234543262777290096 79.543842220751884042  
H 72.454188730455854284 24.044210464919437698 79.552024930056973062  
H 71.745998329744480770 25.540224212582447905 78.943807356166871614  
H 71.739415774948170679 26.537733202312448810 81.011846570237679543  
H 73.405972893100994270 26.462066090299860122 81.143788542897098637  
H 71.373801807071984626 24.220375446699488720 82.045393020716019805  
H 72.278689177299185076 25.266477345787180298 83.116301286457670017  
H 73.480200160411641264 23.234572102012336359 81.332579706148578680  
H 74.408939962156622983 24.381484752919501346 81.996614300090485017  
H 73.694898748914937414 23.264869043757361311 83.016253647086230671  
H 72.467416830201941025 18.753875118873487793 82.638047257777998311  
H 77.476088080655770796 23.743896178698765453 83.644987579235589692  
H 76.479288139020155768 17.156497683992469661 74.044189307820005297  
H 80.891444872667278787 22.692430828881473559 77.562433861533875756  
H 78.746087980069773948 25.188496065950872094 79.054087954008991801  
H 77.952096213906344246 26.062894722873224396 74.342456144181824129  
H 73.860789346429399416 26.833195942938186107 75.837489161787758007

end

end

Task SinglePoint

Engine ADF

title Structure 3 t481 s10000 spin-orbit ZORA

basis

PerAtomType

core None

type ZORA/QZ4P

Symbol Cd

end

PerAtomType

core None

type ZORA/QZ4P

Symbol S

end

PerAtomType

core None

type ZORA/QZ4P

Symbol N

end

PerAtomType

core None

type ZORA/QZ4P

Symbol O

end

PerAtomType

core None

type ZORA/TZ2P

Symbol C

end

PerAtomType

core None

type ZORA/DZP

Symbol H

end

end

numericalquality verygood

symmetry nosym

relativity

level spin-orbit

formalism ZORA  
end

save TAPE10

xc  
  hybrid BHandHLYP  
end

NUCLEARMODEL gaussian

QTENS

EndEngine

eor

Structure 4 with HBandHLYP functional, and a locally dense combination of the basis sets  
QZ4P, TZ2P and DZP:

\$AMSBIN/ams <<eor

System

atoms

Cd 76.757210076034567692 21.181233619427423776 77.851977272947678443  
N 72.716777438463637395 19.188405530888982042 81.718238758524350374  
C 73.925181248386863331 19.895668094415235316 81.309023719813751541  
C 74.465921052078471121 20.878048427090323713 82.458423081726223813  
O 73.725838017148447534 21.596957796441248689 83.094725000914266388  
C 73.715075184261493746 20.663411665681326923 79.956245419933750895  
S 75.062330706795108881 21.870922159478176638 79.579581643786497125  
N 75.793130255219580249 21.056453008622948886 82.752983013880552221  
C 76.311844445641938250 21.847663806596681724 83.879156427623314585  
C 76.462118445733295857 23.278176123303740752 83.604644245094988264  
O 75.560757949688451163 24.035315494809193382 83.346452608689105546  
C 77.676736695031266322 21.242092864940115504 84.201265178694924884  
C 77.884152440016137575 20.081785904599986026 83.187306485056481620  
C 76.979321504095850059 20.451930665671380183 82.065663223030924200  
N 80.288040831170803813 17.724921642744138950 79.012817952710875602  
C 79.054542614411857926 18.106930491704122943 78.212660864019213136  
C 78.222273490912073157 16.799118654140215767 77.891900408591197902  
O 78.280225672708851903 16.227645214948189789 76.824019734656175729  
C 79.317430936002367048 18.901512551065664525 76.940883689270094692  
S 78.952992196743934983 20.678588998157263035 77.002969069505297739  
N 77.597774021896171348 16.145379547811540277 78.952174721356456644  
C 76.566977535025927182 15.098276503780164504 78.774752648624669860

C 75.852336136808062861 15.202292258356154164 77.401697575588855216  
O 75.700860048733886742 14.193798112598720707 76.745741754362569509  
C 75.546159271448104278 15.216122635238154004 79.917926431332674042  
C 75.845989176531517728 16.476997735851568905 80.698987785896221681  
C 77.203428095245513418 16.975651190352351705 80.103624696009219974  
N 75.235740236904277367 16.426307064831455307 77.125680432114606333  
C 75.053054952717019432 16.767976511068866330 75.699371016767898368  
C 76.282427052270861623 17.512404148618436750 75.077172867106725107  
O 76.856886598930856280 18.324743106618427646 75.740617803762759763  
C 73.924919477241232357 17.775216359805387611 75.404906177680828705  
C 73.910838748078163007 18.993542250590220277 76.363155942009100841  
C 72.609059462857658218 16.896153766824507869 75.582809587576591071  
C 74.190671332246580505 20.313880029928753856 75.636253164288433481  
N 80.769987809440166870 23.409996203102462431 78.224988026841828059  
C 79.666033533000700118 23.169169850317771875 79.148527802129848396  
C 78.504913182109447689 24.112711398370795024 78.854333514839680674  
O 77.389630930771048156 23.729636470337169385 78.578207305250032277  
C 80.132754916514826959 23.589884651383794534 80.532907051408201937  
O 79.032484470413621125 23.682097535204359673 81.423360703263142568  
N 77.696988026159402807 25.192996067219496581 74.810989255171747914  
C 76.926426137413656647 23.954644386643124676 74.674456114039514887  
C 76.076326294708138676 23.901202629127617172 75.967258108513263437  
O 75.658698252936531503 22.875109896023094080 76.473800862414591961  
C 77.792814062447376955 22.739282886131292116 74.282337803929110009  
C 76.989381300069169356 21.518529249166338246 73.753529464320408238  
C 78.800720100456473460 23.156713970916790402 73.179558311712753493  
N 75.532199064202643513 25.136344436893594434 76.284610797424718953  
C 74.479443054545953373 25.198753425263937800 77.285709494789159635  
C 73.524893558591102760 26.362670363336828672 76.780978271817645009  
O 72.547494930552403503 26.702658508815865446 77.394093643445586395  
C 75.054422617143814023 25.583980496175080077 78.645132519544077354  
C 73.873908836778070963 25.496319939103837982 79.639284446058496769  
C 74.403614288231452178 25.889242156427883401 81.003414453833656239  
C 73.462378991603742406 25.570458270187291561 82.201477563806264470  
N 73.284351914205913658 24.027682782726316191 82.328073014515624095  
H 72.847463365485566555 18.801852079483385438 82.666991407894897748  
H 74.656326277799763602 19.048494356041629771 81.124696970160883325  
H 72.796923258136175150 21.261093296847867862 79.917588149400202724  
H 73.447586924876546277 19.965222399791507257 79.098700083995922228  
H 75.618904511434607230 21.831135311032003443 84.797225857913176128  
H 77.623788301145836499 20.861174324888590803 85.236656848168166789  
H 78.523735433174962850 21.951135859283091634 84.056019028775736501  
H 77.706876111610625912 19.138549942371586354 83.720613294499187873  
H 78.953342617351424337 20.030104524463506976 82.822091354542934027  
H 77.348590910949425847 21.188461534932759633 81.286162605594824981  
H 76.698633909101928907 19.637625980456718366 81.411088424798947472

H 80.184889394383063177 16.797241795940134779 79.376521140288261336  
H 81.165521510562797403 17.707956209250710344 78.536168747541609036  
H 78.475374711482118073 18.709248116311371746 78.939759398090998843  
H 78.859052366253180821 18.409857720049402019 76.039509194828951877  
H 80.391846597864457635 18.867716856744216614 76.641145410183085573  
H 77.050473587647886120 14.104546403411013955 78.759164638227929345  
H 75.708563584066240537 14.281514109404469082 80.552247025645769440  
H 74.499722882349857400 15.239459354774508526 79.583138418160885408  
H 75.922851964625678534 16.346457061888987283 81.776955650152686417  
H 75.020496877845715744 17.190514321972862888 80.539800693066126769  
H 77.173081568250438522 18.063797327539706572 79.917450295878737165  
H 78.043567312691848770 16.940413410443063924 80.868127396324510414  
H 75.495731883484879177 17.255202218235428546 77.676807323485746792  
H 74.751380263046840469 15.844247233157995325 75.078395928698441253  
H 73.974707027088740574 18.033272167805360908 74.338535739574481909  
H 74.741576724704671619 18.832820925849102167 77.145328906879754527  
H 72.948311633606110149 19.023710204843975902 76.950384319065236127  
H 71.775580826882972474 17.414288350572761033 75.114823607864749988  
H 72.819402974224615832 15.965638513944938381 74.962414394087829805  
H 72.464356963731006545 16.715984173487683506 76.632428990685838244  
H 73.406483120344276472 20.494526156478794832 74.882610481435378347  
H 74.115252999736810580 21.141423652912347819 76.337403276212754122  
H 75.177749396995778852 20.270817339204803886 75.072856308534909431  
H 81.683760258554187317 23.273978699695231143 78.643364258294766955  
H 79.285571799506342927 22.101896422233132000 79.129901306474721423  
H 80.629039263097510570 24.582297598850157527 80.470306665821198067  
H 80.848334785533197078 22.861896524034907685 81.024794052922217702  
H 78.181030923125490517 23.408530725799117533 81.074599801609181782  
H 78.587751700887778838 25.059616663455535956 75.233073831058064229  
H 76.138125365090232322 24.191235342936433739 73.846475107028751950  
H 78.219839096463644523 22.446469066045402485 75.235055782968061067  
H 76.605959198645138031 21.684774732051792512 72.728761934978692238  
H 77.697293803834853065 20.648398910445667553 73.777682269448987995  
H 76.177922596389407772 21.318183873682002627 74.430625070944202548  
H 79.826371786367104733 23.034343762302398773 73.580558927992854024  
H 78.721774989348546114 22.476388821167063270 72.279221605505782122  
H 78.755134072319350480 24.138701372219944830 72.803698758220008358  
H 76.080861230751423818 25.996228383717443933 76.161603887270047153  
H 73.874486849711502146 24.271892249855479662 77.442399723086893459  
H 75.547731266362845304 26.553621363245678566 78.738172567449908001  
H 75.846079034006635311 24.834035459251904143 78.998050854803793186  
H 73.426261055328183147 24.468405025624402782 79.581204917699565726  
H 73.019324279058949401 26.100590754144263883 79.354891875088156894  
H 74.585922454935314363 26.936689443799249233 80.923843056433511833  
H 75.420493672096455384 25.331838223478950312 81.134997620291557041  
H 72.459413757343980933 25.955407481581129758 82.095013476716204082

H 73.879609587987673081 25.968778044193143728 83.182419135925499631  
H 72.301281539258042130 23.788349864956916946 82.552007724624132834  
H 73.383318457278292613 23.622637918114413935 81.381495611397681955  
H 73.911303001030105975 23.480672713856641565 82.880921565232796411  
H 71.933490563664349793 19.782679503051426195 81.771459133312461631  
H 77.476088080655770796 23.743896178698765453 83.644987579235589692  
H 76.479288139020155768 17.156497683992469661 74.044189307820005297  
H 80.760863376525051649 22.800512720520252685 77.399609206413813922  
H 78.746087980069773948 25.188496065950872094 79.054087954008991801  
H 77.858267367358578781 25.732244371804746663 73.979226161099063575  
H 73.860789346429399416 26.833195942938186107 75.837489161787758007  
end  
end

Task SinglePoint

Engine ADF

Title Structure 4 t482 s10000 spin-orbit ZORA

basis  
PerAtomType  
core None  
type ZORA/QZ4P  
Symbol Cd  
end  
PerAtomType  
core None  
type ZORA/QZ4P  
Symbol S  
end  
PerAtomType  
core None  
type ZORA/QZ4P  
Symbol N  
end  
PerAtomType  
core None  
type ZORA/QZ4P  
Symbol O  
end  
PerAtomType  
core None  
type ZORA/TZ2P  
Symbol C  
end



```
PerAtomType
  core None
  type ZORA/DZP
  Symbol H
end
end
```

```
numericalquality verygood
```

```
symmetry nosym
```

```
relativity
  level spin-orbit
  formalism ZORA
end
```

```
save TAPE10
```

```
xc
  hybrid BHandHLYP
end
```

```
NUCLEARMODEL gaussian
```

```
QTENS
```

```
EndEngine
```

```
eor
```

Structure 5 with HBandHLYP functional, and a locally dense combination of the basis sets QZ4P, TZ2P and DZP:  
\$AMSBIN/ams <<eor

```
System
atoms
```

```
Cd 76.079906896664084570 21.042204981683163112 78.207338812709693343
N 72.716777438463637395 19.188405530888982042 81.718238758524350374
C 73.931873966522658748 20.034718623615734856 81.542074965992597413
C 74.339016488413037109 20.802490188362401824 82.765026756633915284
O 73.494803732561933884 21.333869064674715332 83.470006748962262577
C 73.703833428255208560 21.251678061426964916 80.571622030276742521
S 73.729356100642377214 21.058576585203311993 78.796009926542978974
N 75.655852349225355624 21.323301938165261760 82.890436035739824661
C 76.192668032791715405 21.856873239598787251 84.138577336444910770
```

C 76.417911928546146783 23.366876626810267226 83.827353594592892705  
O 75.549580116541946495 24.189520164301658411 83.858224302907544256  
C 77.543209913658174059 21.217047680229374151 84.318262746622878012  
C 78.074283115630365160 20.917783346452036852 82.908874571289828737  
C 76.755449051351448020 20.804432364533880673 82.075179462537846575  
N 80.288040831170803813 17.724921642744138950 79.012817952710875602  
C 79.104705088987827821 18.564281453156109336 78.931188999780474091  
C 78.070729274393642072 17.813820908933212905 78.139508671285852870  
O 78.096107239461559857 17.588841775043157156 76.933514648034488914  
C 79.318895790730678641 19.895735051452721365 78.157443612398608934  
S 78.249687893837517549 21.334043140937392735 78.675131468282884839  
N 77.122978834870806963 17.176981184190143637 78.913033551099601937  
C 75.848703282317970320 16.731352714097216250 78.325481328597390984  
C 75.345781510083554622 17.684050816582018939 77.263375463503606966  
O 75.489573482410619931 18.852722732171621089 77.470700556782759350  
C 74.878175671207443997 16.650628951591368576 79.553201622387518910  
C 75.845989176531517728 16.476997735851568905 80.698987785896221681  
C 76.915901738986804048 17.436793684250584846 80.410317671449973886  
N 74.750912447370538416 17.046841176013582952 76.201608880497346377  
C 74.470474941580732775 17.625355651822694369 74.837325640475981459  
C 75.494697498520238810 17.367091762617882011 73.777117180254577988  
O 75.222142434356712215 17.348240853417749463 72.603974637514227197  
C 74.246616707498006349 19.168954322306692717 74.797347612659720539  
C 73.181685768490822852 19.626636466926711933 73.667574197305441430  
C 75.529735382666459031 20.001109573229683747 74.672636913984732132  
C 71.754961718778503155 19.975966680715345092 74.172092553884809263  
N 80.769987809440166870 23.409996203102462431 78.224988026841828059  
C 80.879820564141468253 24.554555897934374542 79.065318075893188166  
C 79.482900338494445691 24.626025490681204388 79.693687832232271262  
O 79.203355284438359263 24.136114389605932473 80.761525626565145330  
C 81.123829818880366815 25.781400661362177118 78.201670014908188477  
O 80.487043889321796541 25.562431656616453779 76.912964386086613899  
N 77.696988026159402807 25.192996067219496581 74.810989255171747914  
C 77.093111033819468503 23.857702006832823827 74.746737616177895802  
C 76.084105500718834492 23.841063510825936334 75.980270038287088141  
O 75.801009014944042974 22.752988387084201349 76.499886816898410302  
C 77.900449072052509791 22.579139064008312943 74.798680616354474182  
C 78.203789271338251865 22.239905095996423512 73.333245606526588745  
C 79.265520332277134230 22.794204637672123681 75.533284300956154311  
N 75.507195615286207158 25.055360716779052410 76.305927868676235448  
C 74.434489002685467085 25.142588987407215484 77.254341131666578235  
C 73.611212909544590843 26.345945894532945886 76.760608770633169229  
O 72.795755452812329622 26.770487821001445639 77.513602692024164753  
C 74.802772258766765390 25.501572628139260956 78.696895203109690442  
C 73.532739947952407533 25.664486357939701122 79.602869248740859121  
C 74.076049440002833535 25.307316353420972632 81.022974531912240082

H 74.735839951965246541 19.354855995045056716 81.119794751752436923  
H 74.280140033540988043 22.140334354152500396 80.939054171167683194  
H 72.605646321824309553 21.490458054521440090 80.540700235025695974  
H 75.408515309800876025 21.834709968031035032 84.965236841220146857  
H 77.595610634330441258 20.278913020042391935 84.857269458105378135  
H 78.155073900327451497 21.913305854133906081 84.958587717829757935  
H 78.653386123106656669 19.941741362662526171 82.886696634420857777  
H 78.664592033135903648 21.724523011556502894 82.485742728023936365  
H 76.924952374392830734 21.508227876809289825 81.198478479651569728  
H 76.478469932784634011 19.839401912384381887 81.652088369459676187  
H 81.089262592392600482 18.172417274271612797 78.585674163628610245  
H 80.224747856730985518 16.776336280764528652 78.631584588589589657  
H 78.841201562456319607 18.820562943360570785 80.025500779684477948  
H 79.125583257333516940 19.697221081606077320 77.033300432374844036  
H 80.312526898672146558 20.191393811205006870 78.342847286426803066  
H 76.011571844537741072 15.703107453891565370 77.823379204728766467  
H 74.089974355843210674 15.863843857909360580 79.414748962923198405  
H 74.293019982475357210 17.577613718250873376 79.654151332745698255  
H 76.222445309090076648 15.433101179490499533 80.715742671468660774  
H 75.353772674339623450 16.565906892680310136 81.704003488304536518  
H 76.646942153995169633 18.507314591443272178 80.552005010773910954  
H 77.867237733075896244 17.262104560360828742 80.965455365946041866  
H 74.768260981357599348 15.975293379387485615 76.207449418430343258  
H 73.464570483615744934 17.112092034015969233 74.581697870006152584  
H 73.786363048171068613 19.394991711674141044 75.801686107906078860  
H 73.170876760629923297 18.855234054951548472 72.840961594297112924  
H 73.572139950064737945 20.623442073005321618 73.274254872513552073  
H 75.380980083698787553 21.093434356028353704 74.999399937212587020  
H 76.351932770475471557 19.564531795156280936 75.312647991456813656  
H 75.884317773784317751 19.981608344109847764 73.646791782079972677  
H 71.363419858270077611 20.791246786020924020 73.554453772019982694  
H 71.039136277802583663 19.184897342011641541 74.074417144485181552  
H 71.814745668962586933 20.302827554710493274 75.211765116659279329  
H 81.161741623466653550 23.596476820199168145 77.303652593726155828  
H 81.700317381645305659 24.568915938848160607 79.811407416846677165  
H 82.242245235680712767 25.847000968831640222 78.067276164403679672  
H 80.723617179915649444 26.719280208663640508 78.664312033534940838  
H 80.846873839378176285 26.218557925108889606 76.286868706008107210  
H 77.707034597008970422 25.798582495390938618 73.962341144747924204  
H 76.430229406975001893 23.896785570834019552 73.890785384522189361  
H 77.386096719565500734 21.705934580805006817 75.155466431081350720  
H 77.344225977976975628 22.366917322628250275 72.637619595745775314  
H 79.019684322889659711 22.828653223177031606 72.866240591847954988  
H 78.286659426685474727 21.180508902043573727 73.190913668595314334  
H 79.944359539859618735 21.974562261372671657 75.458138140802986982  
H 79.822690289365084482 23.590286364050371049 75.070854171738972127

H 79.111530730874747519 23.036950182218774330 76.608863733290476716  
H 76.137004688582550216 25.880266961814509585 76.165028404426408315  
H 73.791332878111845162 24.178572294415477728 77.160730905421900161  
H 75.352538695414210679 26.492630767696724092 78.704504627760243807  
H 75.478835727457379789 24.693797003465299156 79.006878447067705906  
H 72.803007564342266278 24.864622077934622979 79.252710062252546663  
H 73.121274371623570687 26.601877328987292515 79.607405814540712186  
H 74.666420491145046867 26.127718395809370833 81.483205699587031745  
H 74.782994659351672340 24.450753345873220468 80.958062682659658549  
H 72.071260268358244616 24.360058138180995968 81.253261701058804078  
H 72.403491029620283825 25.800045523190046737 82.231982098542289350  
H 73.674490067921013292 23.190457531700559457 82.849849480243179300  
H 73.829353785910953434 24.656305809153977293 83.678919826411259919  
H 72.335815645173539679 23.736876472951951911 83.611274236186901021  
H 72.201917098250405047 18.966519794029451873 80.849130948383233886  
H 77.476088080655770796 23.743896178698765453 83.644987579235589692  
H 76.479288139020155768 17.156497683992469661 74.044189307820005297  
H 81.139702140313019640 22.527678190129666547 78.554658568207315739  
H 78.746087980069773948 25.188496065950872094 79.054087954008991801  
H 78.554720437384446541 25.214060458358925843 75.354883380940378856  
H 73.860789346429399416 26.833195942938186107 75.837489161787758007  
end  
end

Task SinglePoint

Engine ADF

Title Structure 5 t483 s7000 spin-orbit ZORA

basis

PerAtomType

core None

type ZORA/QZ4P

Symbol Cd

end

PerAtomType

core None

type ZORA/QZ4P

Symbol S

end

PerAtomType

core None

type ZORA/QZ4P

Symbol N

end

```
PerAtomType
  core None
  type ZORA/QZ4P
  Symbol O
end
```

```
PerAtomType
  core None
  type ZORA/TZ2P
  Symbol C
end
```

```
PerAtomType
  core None
  type ZORA/DZP
  Symbol H
end
end
```

```
numericalquality verygood
```

```
symmetry nosym
```

```
relativity
  level spin-orbit
  formalism ZORA
end
```

```
save TAPE10
```

```
xc
  hybrid BHandHLYP
end
```

```
NUCLEARMODEL gaussian
```

```
QTENS
```

```
EndEngine
```

```
eor
```

Structure 6 with HBandHLYP functional, and a locally dense combination of the basis sets QZ4P, TZ2P and DZP:  
\$AMSBIN/ams <<eor

```
System
```

atoms

Cd 75.794611835709702063 20.022972961872181230 77.497902243595632399  
N 72.716777438463637395 19.188405530888982042 81.718238758524350374  
C 73.856721389687507440 19.899756857912365149 81.162491987158574602  
C 74.306426502235083831 21.027828313636049984 82.144615921176779239  
O 73.506265533364128828 21.645994465914871085 82.869129782109396842  
C 73.608291845229260275 20.671778110122808414 79.798178345953857615  
S 73.542400029275057705 19.666841343591368485 78.246797525057999678  
N 75.638523717126929569 21.420043784101142847 82.286625666183951466  
C 76.154275832199544993 21.827697233349134365 83.581366788482569063  
C 76.420600962594775751 23.353673196132305634 83.614311884599445079  
O 75.498645086336452437 24.164781275161384855 83.732181272551571283  
C 77.532983647142259542 21.194374333935755317 83.781142593621808601  
C 77.921704103622033699 20.746849858820265666 82.320140123922470821  
C 76.682243284352963997 20.878720264458429767 81.366089705168292312  
N 80.288040831170803813 17.724921642744138950 79.012817952710875602  
C 79.021923763420190312 18.402133323063853965 78.647599304080500815  
C 78.143795802875388290 17.377696827155098447 78.039641519554976412  
O 78.255493012158851229 16.918724299740425465 76.918989611438092879  
C 79.132545682562380307 19.539418138122297108 77.684985747849111704  
S 77.988018659699918089 20.952149934955279775 77.763661191480082380  
N 77.082524558406504411 16.959822333497236002 78.849388588170441494  
C 76.084513173649853002 16.051099171115591702 78.296932083515272893  
C 75.677437262884595270 16.723803517858012668 76.953910183278921409  
O 76.032798521240323453 17.823396206826902954 76.547661712700460157  
C 75.093576954066691087 15.837111784630103273 79.520433457071135308  
C 75.845989176531517728 16.476997735851568905 80.698987785896221681  
C 77.258325877071726495 16.830385467084902018 80.274920996278197549  
N 74.945501443524051410 15.868821690064756069 76.195065501754555726  
C 74.637697026881255624 15.948610013415526865 74.778422862544815075  
C 75.860534711026687660 16.220346016850136550 73.919573515250860396  
O 76.065566361202215262 15.533949857008014561 72.964416199853729950  
C 73.689891537392099963 17.154986219044069173 74.470777005009679783  
C 72.812613020872603897 16.704995968939382323 73.305393868001218038  
C 74.471367415612718332 18.502737962974560304 73.995569171556269339  
C 71.415693201259770717 16.314850560984393013 73.903151865020134892  
N 80.769987809440166870 23.409996203102462431 78.224988026841828059  
C 80.001044259145601245 23.203354069486849198 79.448271129966542503  
C 78.750388780158274926 24.105986313881555105 79.512316533502612970  
O 77.797207961397987219 23.773841304880363623 80.199043647582357153  
C 80.796598740879360889 23.616143492360947675 80.721570736000600732  
O 81.243770907856500685 24.863946736179812547 80.232935709823181014  
N 77.696988026159402807 25.192996067219496581 74.810989255171747914  
C 77.064020609423607766 23.886337475883323123 74.512483490040708034  
C 76.128268911225092097 23.611138548416306548 75.689726203802649707  
O 75.803881606353570533 22.462172346397590417 76.092073388224278574

C 77.909947515809989227 22.606602579707939071 74.188482590371847891  
C 78.085581512306191598 22.682164797215424556 72.711740515624995851  
C 79.291006736312283465 22.643331281012578415 75.032266924901108496  
N 75.512188714428646108 24.776695299320472543 76.080995517974358222  
C 74.534698661680167220 24.982968676196637858 77.113454783915031499  
C 73.944118345130831926 26.417718392523635629 76.845590482254294784  
O 73.488068922300726626 26.992185101234721145 77.822577167262039666  
C 75.097156117222453986 24.903610283090308997 78.598391120079000416  
C 73.984577493014882066 24.528450019745665855 79.560130660781837264  
C 73.493278239549113096 25.641545926658711352 80.505573744570014583  
C 72.459545108107832334 25.005195349375899383 81.445522337290327641  
N 73.154673843560871660 24.102349038897376232 82.461797920668345796  
H 72.197609145887227555 19.778110255291647235 82.323138570446005247  
H 74.780324913634800055 19.230096057979256585 81.062439827649825475  
H 74.259094121887969209 21.539890718250354951 79.667317154196908291  
H 72.641763742560740980 21.185134582786528057 79.908753239110140498  
H 75.396585884924732568 21.595274709986810535 84.349345929202954153  
H 77.515251629678218137 20.275448154320109495 84.425789555948838938  
H 78.320457110448060689 21.839547207648131177 84.207062035968036184  
H 78.364898295738655065 19.734679073146825345 82.373023420481004564  
H 78.745800315270543024 21.334722022909197392 81.831656207312320817  
H 76.918500414264784126 21.545582568786105782 80.469356519925057114  
H 76.455130855314692440 19.879969354259706904 80.916248211546104585  
H 81.066592192010091367 18.330406600670681172 78.859943158094466753  
H 80.496010561980838816 16.880023460542268765 78.402397607189726614  
H 78.725482088892022148 18.828633474091297728 79.728621368586118479  
H 79.184323566690082430 19.149483060964978876 76.612433747847958898  
H 80.080329302708022965 19.956829992042731448 77.936983774222042598  
H 76.499955757053129446 15.034591780402308814 78.085238221331650266  
H 74.800443179250407866 14.779108435502454455 79.689680323907523984  
H 74.114607647122227263 16.337607074271673469 79.224861954788408980  
H 75.835323112938056056 15.702481947584496780 81.480529653949901103  
H 75.356519826609044799 17.371304768401834906 81.163650402265488992  
H 77.639673432320918778 17.805113014986396536 80.639650559799136431  
H 78.027160388507454059 16.173186375542368154 80.517082310060303030  
H 74.443435685528200452 15.123536258989323855 76.653744602255301288  
H 74.114119295206904781 15.062609970540638216 74.416210216408799738  
H 73.127973600649497143 17.372840034933680897 75.423524834773914449  
H 73.312214209171614243 15.889918405589829931 72.733722079371489144  
H 72.580309580574549955 17.517831465134289459 72.606009227116004467  
H 75.357104508478116145 18.763762514674976245 74.644105841105002241  
H 74.764478226195521415 18.342857613277885775 72.918259058915978699  
H 73.748473097387474695 19.330279902377633050 74.170430161587646012  
H 71.411840871244393725 15.305109280103328828 74.365150996694865171  
H 71.108005510870128774 16.925071043148310679 74.728266056420395103  
H 70.683643770815123730 16.440851904409107931 73.109079346650091225

H 80.447300945999373312 22.917471100227174929 77.443585710172087033  
H 79.659721561740155948 22.137456917644652066 79.506200348395523747  
H 81.567990963955153916 22.896586596169960615 81.043918978441695344  
H 80.155657021449187027 23.841224323268093599 81.608758080993951012  
H 81.698617336061388983 25.270427073888036773 80.990274274764161078  
H 78.145162830573354995 25.495510275262379452 73.979541284865831585  
H 76.343403687056877516 24.037987854457195880 73.698847759430677229  
H 77.508887541704780233 21.655926444607295878 74.501349399484595892  
H 79.073324226328139730 22.995333841369149042 72.407402952807714769  
H 77.912494024718654373 21.771567314108779101 72.200869256058979317  
H 77.386453513028939710 23.362987258638366228 72.219026084875466154  
H 79.736475642881970316 21.672900940490468003 74.982460996319318269  
H 80.009905667972347487 23.355301159633405916 74.577390679876899071  
H 79.127905589545406428 22.825400425822348183 76.142560694572267721  
H 76.125846010175962419 25.577789994545426566 75.818928264091439928  
H 73.568605130853086393 24.386524388111485706 76.966250093434368296  
H 75.511669096634250309 25.901161825956165785 78.794197462401925236  
H 76.058714834370775293 24.334705002862758505 78.619159664689945544  
H 74.418753983804961649 23.670250715156992527 80.101118009042323820  
H 73.069499139417175115 24.257768503623410083 78.943488865542448707  
H 73.007810988618714987 26.495422640465612574 79.962850308136026456  
H 74.320092957709931625 26.156568240994932495 81.088714224511036832  
H 71.747656422308310198 24.426185296599250307 80.684208054478787631  
H 71.945548502590071394 25.770829953072677654 82.039824993159783162  
H 73.471483061796647007 23.207635875130108616 82.039694889263557798  
H 74.040556075492446553 24.487095141437560386 82.762386628116090037  
H 72.541814547421608950 23.832565061494310754 83.157799382043549485  
H 72.079452861565968647 18.829773721760123095 80.981300441728052419  
H 77.476088080655770796 23.743896178698765453 83.644987579235589692  
H 76.479288139020155768 17.156497683992469661 74.044189307820005297  
H 81.168774133430673601 24.332937550739284660 78.209489740283430592  
H 78.746087980069773948 25.188496065950872094 79.054087954008991801  
H 78.420164040808586492 25.039104153808768416 75.475895769706923488  
H 73.860789346429399416 26.833195942938186107 75.837489161787758007  
end  
end

Task SinglePoint

Engine ADF

Title Structure 6 t483 s10000 spin-orbit ZORA

basis

PerAtomType

core None



```
type ZORA/QZ4P
Symbol Cd
end
PerAtomType
core None
type ZORA/QZ4P
Symbol S
end
PerAtomType
core None
type ZORA/QZ4P
Symbol N
end
PerAtomType
core None
type ZORA/QZ4P
Symbol O
end
PerAtomType
core None
type ZORA/TZ2P
Symbol C
end
PerAtomType
core None
type ZORA/DZP
Symbol H
end
end
```

numericalquality verygood

symmetry nosym

```
relativity
level spin-orbit
formalism ZORA
end
```

save TAPE10

```
xc
hybrid BHandHLYP
end
```

NUCLEARMODEL gaussian

QTENS

EndEngine

eor

Structure 7 with HBandHLYP functional, and a locally dense combination of the basis sets QZ4P, TZ2P and DZP:

\$AMSBIN/ams <<eor

System

atoms

Cd -14.267989241917430121 14.019596770861495472 -0.122904062020070939  
N -12.483998912078915211 18.626998573046584795 0.656999962964864959  
C -13.665633728531826563 17.725786563290963471 0.422672859221957353  
C -13.453313438023659643 17.140849135165669992 -1.024899147506411756  
O -13.749722343870805830 15.981483068461077579 -1.270019292029838542  
C -15.031634278405283212 18.424669080172041191 0.255741917783260775  
O -15.835288263941224685 17.424029126953914925 -0.508842994220669920  
H -12.162637832438633723 19.092932775615619079 -0.162127566615344165  
H -13.596665185674837062 16.838897340835394800 1.000694314382262862  
H -15.078676169951670261 19.413406008547347881 -0.204572312915051208  
H -15.468263825687900592 18.488844423917878856 1.342464612942873448  
H -16.105924843512013922 16.745023536270210229 0.133955694449716334  
N -9.514999383899768404 15.385998784737989098 -2.101999823518093446  
C -10.200354064662684905 14.106783309095799694 -2.002749763797477378  
C -11.721322487318252215 14.013153828162247194 -2.430015631609617532  
O -12.625338210249626769 13.516067837109796201 -1.806807671946228488  
C -10.052178587137564847 13.375050442813895657 -0.639881485541086481  
C -10.101202729163780702 11.892168306426926350 -0.826811779413959669  
C -8.762897333328799832 13.598784486765607582 0.115817285302559511  
H -9.918273373356042200 16.129521372033551074 -1.468650106245681819  
H -9.744711641578541972 13.516862791350208184 -2.866049048225821849  
H -10.811434321787418256 13.842995301052789969 0.015071173283832595  
H -11.089630158474371058 11.438349524600276652 -1.000684349917445592  
H -9.456201283213662379 11.473243521038311243 -1.664700761963670894  
H -9.761424805134932825 11.387565908650083557 0.081965488578827919  
H -8.826990578920693054 13.187670846390460611 1.135180512272071951  
H -7.919396091213602773 13.085872619379951942 -0.353384793833659894  
H -8.417015106723912510 14.587067608472455760 0.168459459658233168  
N -11.857688485735062400 14.471264202022442902 -3.695961439477382093  
C -13.014265037821370896 14.345399933623944833 -4.575276090749518687  
C -12.312323215097478624 14.060153118323006183 -5.916600146945733663  
O -12.627341162739469382 14.340471270103375190 -7.036776865869693864  
C -13.826604835490590162 15.673468590541400403 -4.819242243381171242

C -14.959595066209331549 15.523308249303878981 -5.859151216511226501  
C -15.665578643142406889 14.266797100197008419 -5.577445376961824408  
C -17.192647419297838240 14.429646843397048173 -5.374464629445799169  
N -17.909394202952420017 13.189668943806221790 -4.826325026273506680  
H -11.008795023116707767 14.795429497939123209 -4.164333303501692285  
H -13.708480146799445265 13.528194032986684547 -4.159738991144473097  
H -13.130150938292816321 16.524165262610072347 -5.060614575257836201  
H -14.336251591659898708 15.859287981499198494 -3.885070614382706733  
H -14.573032915924519770 15.669988083818267910 -6.897966848383470406  
H -15.617381077865626793 16.488588541675554211 -5.759831026252319575  
H -15.228406658900409454 13.615535356956264934 -4.787288583536359887  
H -15.525631975969769627 13.566114614697458052 -6.429691689484208439  
H -17.620360862196221774 14.714081141549595344 -6.340789856665331570  
H -17.331124703759051897 15.220859650233103721 -4.576583558996017764  
H -18.833411128148270564 13.477107107778394379 -4.648064747097623517  
H -17.974092072894926275 12.335498871985677738 -5.384990380319615078  
H -17.444806944468194132 13.082455300075402249 -3.865565567905717703  
N -18.884647547286942171 10.744317197894080351 -0.262132163549071429  
C -18.230156235893659300 11.970224621353318994 -0.593202079527070381  
C -18.997125436558739864 12.771960203754915142 -1.606760810254761251  
O -18.941662640213369428 12.584589563926945388 -2.854445421546565775  
C -16.787094613060826731 11.850696036516019660 -0.962535665321192058  
S -16.117615960777136763 13.484220867932474874 -1.712295636664063148  
H -19.859623609247154974 10.699068091183491447 -0.049414954931791315  
H -18.266774777102423144 12.476678629745766358 0.484449633964064930  
H -16.677795052405617326 11.072571520081467611 -1.729803268767234448  
H -16.184340280460475014 11.565276611890377367 -0.137510202595082454  
N -19.758939201448590950 13.800097702963917357 -1.067621647055547518  
C -20.353420504251911183 14.744858850446599163 -2.018275237672836120  
C -19.218282486891091310 15.450554878655404778 -2.808364693151653491  
O -19.268937766711928816 15.344008340506753996 -4.042896728860466915  
C -20.962475285281900739 15.810515084042092937 -1.179194915840195090  
C -21.325303523562691765 15.093271573402070374 0.133386215803068559  
C -20.078088242148403708 14.141219588085515824 0.361443599866676124  
H -21.032640761633007997 14.242526283878071069 -2.700952065966225835  
H -21.828773014525886254 16.228786410105925597 -1.637674868187943611  
H -20.204351050592425310 16.612194429305731092 -0.900242357621329981  
H -22.221257829883057866 14.562180543932411680 0.120688372612071826  
H -21.344711834588334654 15.865687201099349934 0.904275363126703868  
H -19.191713280906743222 14.641942497661778688 0.852977477530397543  
H -20.363686088609288305 13.298982121402284307 0.966366879766575204  
N -18.311682048421285884 16.213107004246520404 -2.190179666913172341  
C -17.546277045553267726 17.238163620192846537 -2.922384321683280994  
H -17.999998724374666637 15.854999019264530702 -1.249999646826303046  
H -16.442212540839353352 16.819206996589581848 -3.023173159424773271  
H -17.545079126722281870 18.121118654440479645 -2.300091276601269552

C -15.652409620311098948 16.624411495927368776 5.064197730743054571  
O -16.685682144069971855 16.371562501948673685 4.496600927241761525  
N -14.524815041237195246 16.034873322409740837 4.612865601159024109  
C -14.456614748191512376 15.043281500586330068 3.475944388493255044  
C -14.704515261108369373 13.655550752255832592 4.184780358526013266  
O -13.805886457056733008 13.202000810900090144 4.840972247854781862  
C -13.078804134050791674 15.067333711860410261 2.869269297809808883  
S -13.039975154336653773 13.592853650083375427 1.832895709875246970  
H -13.821436601306640313 15.928413993556551631 5.340942378633139143  
H -15.285687044599468365 15.351528690652338938 2.781904533027951487  
H -12.324277546929684135 14.952137343580680806 3.658742531457801039  
H -12.820966523400018744 16.068692077901474136 2.374425052317294504  
N -15.817777358216059014 12.890166783365570424 3.975363337356227600  
C -15.962917417725771330 11.627018069022879487 4.728794371462997859  
C -15.285027762146121688 10.486557380791355243 3.877799183324895260  
O -15.963699666652647835 9.493124208004553921 3.460272051493007872  
C -17.513626298463112363 11.339497123973847792 4.673919839011692723  
C -18.115998601851693195 12.219999282161753129 3.589999565663362979  
C -17.159111023947577479 13.448588149611365949 3.783154442836299314  
H -15.534614568320224137 11.619712709834690401 5.766095591787158803  
H -18.023124730425937656 11.526233498760893426 5.638457819651574887  
H -17.619244396479881942 10.251202727274375093 4.451008776853123905  
H -19.207172030788679962 12.480750440296219494 3.744289594823532408  
H -17.981761548182706889 11.801257858363058517 2.545580454582609953  
H -17.198858876840620979 14.195022117236145931 3.024140551737435789  
H -17.479677000358002203 13.874219258791967491 4.788789670075302318  
N -13.970493943372634504 10.544447662431480239 3.618781482131812943  
C -13.198077797529526478 9.428429989459537808 3.051660491398848762  
C -12.113872951406326806 9.412422801357037017 4.200609639909281157  
O -12.054717536948608370 8.517858177309358680 4.986253857822079638  
C -12.610750631552425816 9.643485650553467181 1.587041157730490371  
C -13.866458625180641206 9.686681791284861731 0.708380101642266946  
C -11.605822172583536656 8.572092168466618034 1.122677709690519610  
C -13.504744337601069404 10.377629271378703280 -0.576646064090553523  
H -13.589342327247528885 11.475118272702578892 3.466439319226982896  
H -13.724953758447467678 8.439252826633499183 3.052613612337460314  
H -12.077238566936054909 10.634803380635926118 1.628137845760444069  
H -14.710855429183840926 10.176368971292738763 1.225597686587587276  
H -14.197478215118858103 8.589754101305452139 0.502206745498627316  
H -11.212563818733736198 7.951957184745549689 1.976149103511086746  
H -12.084467824230664235 7.888491624427461879 0.403817443315468205  
H -10.811666925334527889 9.087352901761274637 0.579164998068806391  
H -13.158463548246603025 11.415135756237210884 -0.285948090951692935  
H -12.684012956346949252 9.965932809185819252 -1.160756820324783778  
H -14.410399455675554137 10.554558719375856768 -1.247596387415470298  
O -16.361985462854082840 14.866041040541698948 1.128194972637718951

H -16.741683209845962921 14.030187755610086242 1.367924774873419791  
H -17.104428559645210584 15.382804598161072818 1.208925603679311678  
O -18.798998628591963467 16.529998944969719332 2.579999774826192027  
H -18.087251912628602213 16.755138242884939359 3.241210635517711047  
H -18.790377900111355558 17.317790430850987349 2.045209201011181310  
H -15.693398883393877341 17.297698546493279537 5.929899470008053619  
H -18.096139260051266717 17.379498001484634528 -3.906553285421857868  
H -13.138098983942295916 17.798298598013452931 -1.877100039167801659  
H -11.744999236447506874 10.394099254605809080 4.351599870684055738  
H -12.575801292696857203 19.125621539120242431 1.559003249332665986  
H -8.571905811617682502 15.340870606695540701 -1.724894061256891931  
H -18.561614053627071286 10.041783929820262244 -0.874227465807818516  
H -11.276599088875178367 13.480698892139882261 -5.877399799172611239  
end  
end

Task SinglePoint

Engine ADF

title Structure 7 t682 s12000 spin-orbit ZORA

basis

PerAtomType

core None

type ZORA/QZ4P

Symbol Cd

end

PerAtomType

core None

type ZORA/QZ4P

Symbol S

end

PerAtomType

core None

type ZORA/QZ4P

Symbol N

end

PerAtomType

core None

type ZORA/QZ4P

Symbol O

end

PerAtomType

core None

type ZORA/TZ2P

```

Symbol C
end
PerAtomType
core None
type ZORA/DZP
Symbol H
end
end

```

```
numericalquality verygood
```

```
symmetry nosym
```

```

relativity
level spin-orbit
formalism ZORA
end

```

```
save TAPE10
```

```

xc
hybrid BHandHLYP
end

```

```
NUCLEARMODEL gaussian
```

```
QTENS
```

```
EndEngine
```

```
eor
```

## 111Cd Vzz and $\eta$ for the small model

| <b>Structure 1</b> | <b>Nr atoms 24</b>    |                       |                            |
|--------------------|-----------------------|-----------------------|----------------------------|
| <b>Functional</b>  |                       | <b>111Cd Vzz [au]</b> | <b>asym. parameter eta</b> |
| B3LYP              | Spin-orbit            | -3,09602              | 0,36663                    |
| B3LYP              | Spin-orbit w all QZ4P | -3,09728              | 0,36356                    |
| B3LYP              | Scalar                | -3,05336              | 0,36663                    |
| BHandH             | Spin-orbit            | -3,65915              | 0,36744                    |
| BHandH             | Spin-orbit w all QZ4P | -3,66510              | 0,31757                    |
| BHandH             | Scalar                | -3,60802              | 0,36663                    |
| BHandHLYP          | Spin-orbit            | -3,68404              | 0,31966                    |
| BHandHLYP          | Spin-orbit w all QZ4P | -3,69005              | 0,31141                    |

|                    |                       |          |         |
|--------------------|-----------------------|----------|---------|
| BHandHLYP          | Scalar                | -3,63310 | 0,31880 |
| KMLYP              | Spin-orbit            | -3,79538 | 0,31388 |
| KMLYP              | Spin-orbit w all QZ4P | -3,80187 | 0,30487 |
| KMLYP              | Scalar                | -3,74305 | 0,31324 |
| mPW1K              | Spin-orbit            | -3,63468 | 0,31388 |
| mPW1K              | Spin-orbit w all QZ4P | -3,63870 | 0,31210 |
| mPW1K              | Scalar                | -3,74305 | 0,31324 |
| PBE0               | Spin-orbit            | -3,07048 | 0,65837 |
| PBE0               | Spin-orbit w all QZ4P | -3,27558 | 0,34251 |
| PBE0               | Scalar                | -3,02581 | 0,66893 |
| PBE0               | No-relativity         | -3,03246 | 0,66251 |
| <b>Structure 2</b> | <b>Nr atoms 17</b>    |          |         |
| B3LYP              | Spin-orbit            | -3,32989 | 0,40922 |
| B3LYP              | Spin-orbit w all QZ4P | -3,37258 | 0,40263 |
| B3LYP              | Scalar                | -3,32989 | 0,40922 |
| BHandH             | Spin-orbit            | -3,94717 | 0,25825 |
| BHandH             | Spin-orbit w all QZ4P | -3,95108 | 0,35882 |
| BHandH             | Scalar                | -3,89872 | 0,36447 |
| BHandHLYP          | Spin-orbit            | -3,97118 | 0,35859 |
| BHandHLYP          | Spin-orbit w all QZ4P | -3,97533 | 0,35929 |
| BHandHLYP          | Scalar                | -3,92297 | 0,36481 |
| KMLYP              | Spin-orbit            | -4,08879 | 0,35060 |
| KMLYP              | Spin-orbit w all QZ4P | -4,09299 | 0,35136 |
| KMLYP              | Scalar                | -4,03903 | 0,35664 |
| mPW1K              | Spin-orbit            | -3,92435 | 0,36193 |
| mPW1K              | Spin-orbit w all QZ4P | -3,92711 | 0,36324 |
| mPW1K              | Scalar                | -3,87628 | 0,36804 |
| PBE0               | Spin-orbit            | -3,54784 | 0,38640 |
| PBE0               | Spin-orbit w all QZ4P | -3,55517 | 0,38744 |
| PBE0               | Scalar                | -3,49991 | 0,39685 |
| PBE0               | No-relativity         | -3,50441 | 0,39310 |
| <b>Structure 3</b> | <b>Nr atoms 23</b>    |          |         |
| B3LYP              | Spin-orbit            | -2,62332 | 0,58730 |
| B3LYP              | Spin-orbit w all QZ4P | -2,66091 | 0,57950 |
| B3LYP              | Scalar                | -2,62332 | 0,58730 |
| BHandH             | Spin-orbit            | -3,12056 | 0,53382 |
| BHandH             | Spin-orbit w all QZ4P | -3,11678 | 0,53361 |
| BHandH             | Scalar                | -3,07422 | 0,54118 |
| BHandHLYP          | Spin-orbit            | -3,13956 | 0,53608 |
| BHandHLYP          | Spin-orbit w all QZ4P | -3,13590 | 0,53580 |
| BHandHLYP          | Scalar                | -3,09353 | 0,54328 |
| KMLYP              | Spin-orbit            | -3,22894 | 0,52607 |
| KMLYP              | Spin-orbit w all QZ4P | -3,22448 | 0,52598 |
| KMLYP              | Scalar                | -3,18104 | 0,53335 |
| mPW1K              | Spin-orbit            | -3,09372 | 0,53469 |

|                    |                       |          |         |
|--------------------|-----------------------|----------|---------|
| mPW1K              | Spin-orbit w all QZ4P | -3,08841 | 0,53557 |
| mPW1K              | Scalar                | -3,04807 | 0,54184 |
| PBE0               | Spin-orbit            | -2,80678 | 0,55956 |
| PBE0               | Spin-orbit w all QZ4P | -2,79766 | 0,55979 |
| PBE0               | Scalar                | -2,75564 | 0,57153 |
| PBE0               | No-relativity         | -2,76421 | 0,56785 |
| <b>Structure 4</b> | <b>Nr atoms 23</b>    |          |         |
| B3LYP              | Spin-orbit            | -3,09602 | 0,36663 |
| B3LYP              | Spin-orbit w all QZ4P | -3,09728 | 0,36356 |
| B3LYP              | Scalar                | -3,05336 | 0,36663 |
| BHandH             | Spin-orbit            | -3,65915 | 0,32614 |
| BHandH             | Spin-orbit w all QZ4P | -3,66510 | 0,31757 |
| BHandH             | Scalar                | -3,60802 | 0,32525 |
| BHandHLYP          | Spin-orbit            | -3,68404 | 0,31966 |
| BHandHLYP          | Spin-orbit w all QZ4P | -3,69005 | 0,31141 |
| BHandHLYP          | Scalar                | -3,63310 | 0,31880 |
| KMLYP              | Spin-orbit            | -3,79538 | 0,31388 |
| KMLYP              | Spin-orbit w all QZ4P | -3,80187 | 0,30487 |
| KMLYP              | Scalar                | -3,74305 | 0,31324 |
| mPW1K              | Spin-orbit            | -3,63468 | 0,31915 |
| mPW1K              | Spin-orbit w all QZ4P | -3,63870 | 0,31210 |
| mPW1K              | Scalar                | -3,58417 | 0,31827 |
| PBE0               | Spin-orbit            | -3,17135 | 0,31024 |
| PBE0               | Spin-orbit w all QZ4P | -3,27558 | 0,34251 |
| PBE0               | Scalar                | -3,12111 | 0,31918 |
| PBE0               | No-relativity         | -3,12119 | 0,31858 |
| <b>Structure 5</b> | <b>Nr atoms 23</b>    |          |         |
| B3LYP              | Spin-orbit            | -3,68468 | 0,16109 |
| B3LYP              | Spin-orbit w all QZ4P | -3,73353 | 0,16134 |
| B3LYP              | Scalar                | -3,68468 | 0,16109 |
| BHandH             | Spin-orbit            | -4,30333 | 0,13349 |
| BHandH             | Spin-orbit w all QZ4P | -4,28481 | 0,13662 |
| BHandH             | Scalar                | -4,23748 | 0,13481 |
| BHandHLYP          | Spin-orbit            | -4,33608 | 0,12714 |
| BHandHLYP          | Spin-orbit w all QZ4P | -4,31626 | 0,13039 |
| BHandHLYP          | Scalar                | -4,27064 | 0,12838 |
| KMLYP              | Spin-orbit            | -4,44219 | 0,12444 |
| KMLYP              | Spin-orbit w all QZ4P | -4,42118 | 0,12780 |
| KMLYP              | Scalar                | -4,37463 | 0,12257 |
| mPW1K              | Spin-orbit            | -4,26992 | 0,13020 |
| mPW1K              | Spin-orbit w all QZ4P | -4,25178 | 0,13326 |
| mPW1K              | Scalar                | -4,20546 | 0,13149 |
| PBE0               | Spin-orbit            | -3,90735 | 0,14938 |
| PBE0               | Spin-orbit w all QZ4P | -3,89509 | 0,15168 |
| PBE0               | Scalar                | -3,84146 | 0,15168 |



|                    |                       |          |         |
|--------------------|-----------------------|----------|---------|
| PBE0               | No-relativity         | -3,84752 | 0,15104 |
| <b>Structure 6</b> | <b>Nr atoms 23</b>    |          |         |
| B3LYP              | Spin-orbit            | -3,36226 | 0,15552 |
| B3LYP              | Spin-orbit w all QZ4P | -3,41557 | 0,15250 |
| B3LYP              | Scalar                | -3,36226 | 0,15552 |
| BHandH             | Spin-orbit            | -3,94989 | 0,13943 |
| BHandH             | Spin-orbit w all QZ4P | -3,96838 | 0,14192 |
| BHandH             | Scalar                | -3,89610 | 0,14400 |
| BHandHLYP          | Spin-orbit            | -3,97811 | 0,14372 |
| BHandHLYP          | Spin-orbit w all QZ4P | -3,99716 | 0,14609 |
| BHandHLYP          | Scalar                | -3,92438 | 0,12838 |
| KMLYP              | Spin-orbit            | -4,08247 | 0,14033 |
| KMLYP              | Spin-orbit w all QZ4P | -4,10289 | 0,14285 |
| KMLYP              | Scalar                | -4,02763 | 0,14470 |
| mPW1K              | Spin-orbit            | -3,92452 | 0,14433 |
| mPW1K              | Spin-orbit w all QZ4P | -3,93963 | 0,14718 |
| mPW1K              | Scalar                | -3,87132 | 0,14882 |
| PBE0               | Spin-orbit            | -3,57389 | 0,14903 |
| PBE0               | Spin-orbit w all QZ4P | -3,58289 | 0,14979 |
| PBE0               | Scalar                | -3,51969 | 0,15700 |
| PBE0               | No-relativity         | -3,52520 | 0,15402 |
| <b>Structure 7</b> | <b>Nr atoms 26</b>    |          |         |
| B3LYP              | Spin-orbit            | -2,93039 | 0,37057 |
| B3LYP              | Spin-orbit w all QZ4P | -2,97619 | 0,36027 |
| B3LYP              | Scalar                | -2,93039 | 0,37057 |
| BHandH             | Spin-orbit            | -3,43653 | 0,32994 |
| BHandH             | Spin-orbit w all QZ4P | -3,43632 | 0,32901 |
| BHandH             | Scalar                | -3,38265 | 0,33802 |
| BHandHLYP          | Spin-orbit            | -3,46321 | 0,32549 |
| BHandHLYP          | Spin-orbit w all QZ4P | -3,46256 | 0,32468 |
| BHandHLYP          | Scalar                | -3,40959 | 0,33341 |
| KMLYP              | Spin-orbit            | -3,54780 | 0,32128 |
| KMLYP              | Spin-orbit w all QZ4P | -3,54725 | 0,32062 |
| KMLYP              | Scalar                | -3,49280 | 0,32904 |
| mPW1K              | Spin-orbit            | -3,40735 | 0,32864 |
| mPW1K              | Spin-orbit w all QZ4P | -3,40480 | 0,32833 |
| mPW1K              | Scalar                | -3,35443 | 0,33659 |
| PBE0               | Spin-orbit            | -3,10772 | 0,34885 |
| PBE0               | Spin-orbit w all QZ4P | -3,10895 | 0,34842 |
| PBE0               | Scalar                | -3,05145 | 0,35949 |
| PBE0               | No-relativity         | -3,05845 | 0,35768 |

## 111Cd Vzz and $\eta$ for the large model

| <b>Structure 1</b> | <b>Nr atoms 138</b>   |                       |                            |
|--------------------|-----------------------|-----------------------|----------------------------|
| <b>Functional</b>  |                       | <b>111Cd Vzz [au]</b> | <b>asym. parameter eta</b> |
| B3LYP              | Spin-orbit            | -2,505110             | 0,889560                   |
| B3LYP              | Spin-orbit w all QZ4P | -2,525730             | 0,890310                   |
| B3LYP              | Scalar                | -2,468160             | 0,897120                   |
| BHandH             | Spin-orbit            | -2,687520             | 0,750100                   |
| BHandH             | Scalar                | -2,648980             | 0,756730                   |
| BHandHLYP          | Spin-orbit            | -2,764600             | 0,781800                   |
| BHandHLYP          | Scalar                | -2,724730             | 0,788290                   |
| KMLYP              | Spin-orbit            | -2,750540             | 0,743250                   |
| KMLYP              | Scalar                | -2,711640             | 0,749500                   |
| mPW1K              | Spin-orbit            | -2,693200             | 0,798850                   |
| mPW1K              | Spin-orbit w all QZ4P | -2,742020             | 0,802510                   |
| PBE0               | Spin-orbit            | -2,569300             | 0,863800                   |
| PBE0               | Spin-orbit w all QZ4P | -2,592370             | 0,865040                   |
| PBE0               | Scalar                | -2,531760             | 0,870840                   |
| <b>Structure 2</b> | <b>Nr atoms 125</b>   |                       |                            |
| B3LYP              | Spin-orbit            | -2,984280             | 0,272490                   |
| B3LYP              | Spin-orbit w all QZ4P | -3,005000             | 0,274490                   |
| B3LYP              | Scalar                | -2,944600             | 0,279110                   |
| BHandH             | Spin-orbit            | -3,411280             | 0,232070                   |
| BHandH             | Scalar                | -3,366110             | 0,237740                   |
| BHandHLYP          | Spin-orbit            | -3,494190             | 0,243970                   |
| BHandHLYP          | Scalar                | -3,447820             | 0,249580                   |
| KMLYP              | Spin-orbit            | -3,540250             | 0,235770                   |
| KMLYP              | Scalar                | -3,494000             | 0,241340                   |
| PBE0               | Scalar                | -3,054270             | 0,264920                   |
| <b>Structure 3</b> | <b>Nr atoms 125</b>   |                       |                            |
| B3LYP              | Spin-orbit            | -2,398669             | 0,650520                   |
| B3LYP              | Spin-orbit w all QZ4P | -2,410710             | 0,645570                   |
| B3LYP              | Scalar                | -2,360770             | 0,661500                   |
| BHandH             | Spin-orbit            | -2,875140             | 0,547760                   |
| BHandH             | Scalar                | -2,831000             | 0,556260                   |
| BHandHLYP          | Spin-orbit            | -2,910340             | 0,553960                   |
| BHandHLYP          | Spin-orbit w all QZ4P | -2,941810             | 0,544240                   |
| BHandHLYP          | Scalar                | -2,865910             | 0,562610                   |
| KMLYP              | Spin-orbit            | -2,990230             | 0,535370                   |
| KMLYP              | Spin-orbit w all QZ4P | -3,020070             | 0,527510                   |
| KMLYP              | Scalar                | -2,945250             | 0,543280                   |
| mPW1K              | Spin-orbit            | -2,810630             | 0,580680                   |

|                    |                       |           |          |
|--------------------|-----------------------|-----------|----------|
| PBE0               | Spin-orbit            | -2,512850 | 0,627720 |
| PBE0               | Spin-orbit w all QZ4P | -2,525690 | 0,622580 |
| PBE0               | Scalar                | -2,473380 | 0,637980 |
| <b>Structure 4</b> | <b>Nr atoms 125</b>   |           |          |
| B3LYP              | Spin-orbit            | -2,749590 | 0,336040 |
| B3LYP              | Spin-orbit w all QZ4P | -2,759700 | 0,339070 |
| B3LYP              | Scalar                | -2,709340 | 0,337550 |
| BHandH             | Spin-orbit            | -3,078900 | 0,267560 |
| BHandH             | Scalar                | -3,035370 | 0,269970 |
| BHandHLYP          | Spin-orbit            | -3,141750 | 0,271940 |
| BHandHLYP          | Scalar                | -3,097280 | 0,274390 |
| KMLYP              | Spin-orbit            | -3,173860 | 0,263240 |
| KMLYP              | Scalar                | -3,129270 | 0,265880 |
| mPW1K              | Spin-orbit            | -3,085540 | 0,273950 |
| PBE0               | Spin-orbit            | -2,854190 | 0,312130 |
| PBE0               | Spin-orbit w all QZ4P | -2,525690 | 0,315000 |
| PBE0               | Scalar                | -2,812940 | 0,313780 |
| <b>Structure 5</b> | <b>Nr atoms 125</b>   |           |          |
| B3LYP              | Spin-orbit            | -3,656520 | 0,225490 |
| B3LYP              | Spin-orbit w all QZ4P | -3,669930 | 0,225850 |
| B3LYP              | Scalar                | -3,590690 | 0,228120 |
| BHandH             | Spin-orbit            | -4,168950 | 0,194160 |
| BHandH             | Spin-orbit w all QZ4P | -4,189230 | 0,194870 |
| BHandH             | Scalar                | -4,091980 | 0,195480 |
| BHandHLYP          | Spin-orbit            | -4,229460 | 0,186900 |
| BHandHLYP          | Spin-orbit w all QZ4P | -4,249430 | 0,187720 |
| BHandHLYP          | Scalar                | -4,152300 | 0,188130 |
| KMLYP              | Spin-orbit            | -4,310340 | 0,183200 |
| KMLYP              | Spin-orbit w all QZ4P | -4,331330 | 0,184170 |
| KMLYP              | Scalar                | -4,230710 | 0,184180 |
| mPW1K              | Spin-orbit            | -3,731780 | 0,184960 |
| mPW1K              | Spin-orbit w all QZ4P | -3,748520 | 0,190840 |
| PBE0               | Spin-orbit            | -3,791590 | 0,214470 |
| PBE0               | Spin-orbit w all QZ4P | -3,805740 | 0,214950 |
| PBE0               | Scalar                | -3,723130 | 0,216820 |
| <b>Structure 6</b> | <b>Nr atoms 125</b>   |           |          |
| B3LYP              | Spin-orbit            | -3,252900 | 0,201710 |
| B3LYP              | Spin-orbit w all QZ4P | -3,261930 | 0,339070 |
| B3LYP              | Scalar                | -3,200890 | 0,208890 |
| BHandH             | Spin-orbit            | -3,741160 | 0,171310 |
| BHandH             | Spin-orbit w all QZ4P | -3,771510 | 0,185000 |
| BHandH             | Scalar                | -3,682240 | 0,177820 |
| BHandHLYP          | Spin-orbit            | -3,807110 | 0,179420 |
| BHandHLYP          | Spin-orbit w all QZ4P | -3,839940 | 0,193190 |
| BHandHLYP          | Scalar                | -3,747450 | 0,185900 |

|                    |                       |           |          |
|--------------------|-----------------------|-----------|----------|
| KMLYP              | Spin-orbit            | -3,881600 | 0,174140 |
| KMLYP              | Scalar                | -3,821020 | 0,180450 |
| mPW1K              | Spin-orbit            | -4,139860 | 0,191670 |
| mPW1K              | Spin-orbit w all QZ4P | -4,158160 | 0,192480 |
| PBE0               | Spin-orbit            | -3,393200 | 0,195500 |
| PBE0               | Spin-orbit w all QZ4P | -3,402420 | 0,200930 |
| PBE0               | Scalar                | -3,339320 | 0,202300 |
| <b>Structure 7</b> | <b>Nr atoms 138</b>   |           |          |
| B3LYP              | Spin-orbit            | -2,528770 | 0,459480 |
| B3LYP              | Spin-orbit w all QZ4P | -2,546130 | 0,460960 |
| B3LYP              | Scalar                | -2,484560 | 0,468840 |
| BHandH             | Spin-orbit            | -2,922770 | 0,410340 |
| BHandH             | Scalar                | -2,870520 | 0,420550 |
| BHandHLYP          | Spin-orbit            | -2,963790 | 0,414560 |
| BHandHLYP          | Scalar                | -2,911600 | 0,424500 |
| KMLYP              | Spin-orbit            | -3,014220 | 0,408000 |
| KMLYP              | Scalar                | -2,960310 | 0,418230 |
| mPW1K              | Spin-orbit            | -2,869720 | 0,426850 |
| PBE0               | Spin-orbit            | -2,621230 | 0,446420 |
| PBE0               | Spin-orbit w all QZ4P | -2,640890 | 0,447230 |
| PBE0               | Scalar                | -2,575510 | 0,455910 |

## Bond length and angle for the small model system

### Structure 1

| Structure 1 |     |        |    |    |    |      |       |          |  |
|-------------|-----|--------|----|----|----|------|-------|----------|--|
| Row         | Tag | Symbol | NA | NB | NC | Bond | Angle | Dihedral |  |
| 1           | 1   | Cd     |    |    |    |      |       |          |  |

|    |    |   |    |    |    |           |             |              |
|----|----|---|----|----|----|-----------|-------------|--------------|
| 2  | 2  | C | 1  |    |    | 3,2064793 |             |              |
| 3  | 3  | O | 1  | 2  |    | 2,1672835 | 15,3289906  |              |
| 4  | 4  | N | 2  | 1  | 3  | 1,3794743 | 121,8789239 | -83,7792292  |
| 5  | 5  | H | 4  | 2  | 1  | 0,9867109 | 123,1720537 | -161,1560498 |
| 6  | 6  | C | 1  | 3  | 2  | 3,6817359 | 131,8642562 | -80,7531041  |
| 7  | 7  | S | 6  | 1  | 3  | 1,9115585 | 34,6996933  | 14,0779504   |
| 8  | 8  | H | 6  | 1  | 3  | 1,1269195 | 140,8770898 | 6,4019724    |
| 9  | 9  | H | 6  | 1  | 3  | 1,1352179 | 92,8540340  | 127,1271956  |
| 10 | 10 | C | 1  | 3  | 2  | 4,1380376 | 114,3006659 | 117,7110955  |
| 11 | 11 | C | 10 | 1  | 3  | 1,4977725 | 59,7802861  | -127,5608993 |
| 12 | 12 | O | 1  | 10 | 11 | 3,4706767 | 34,0504332  | -34,4162617  |
| 13 | 13 | C | 10 | 1  | 3  | 1,5961587 | 54,4946806  | 19,1500152   |
| 14 | 14 | S | 13 | 10 | 1  | 1,7820126 | 109,0994992 | 39,9300362   |
| 15 | 15 | H | 10 | 1  | 3  | 1,1437113 | 106,2988870 | 121,4970478  |
| 16 | 16 | H | 13 | 10 | 1  | 1,0848220 | 118,0707624 | -85,4826216  |
| 17 | 17 | H | 13 | 10 | 1  | 1,1174726 | 109,6666139 | 156,3600097  |
| 18 | 18 | N | 11 | 10 | 1  | 1,3432570 | 116,9644654 | -109,9759479 |
| 19 | 19 | H | 10 | 1  | 3  | 1,0700000 | 144,6205565 | -54,1580633  |
| 20 | 20 | H | 18 | 11 | 10 | 1,0000000 | 118,3239554 | 20,7693529   |
| 21 | 21 | H | 18 | 11 | 10 | 1,0000000 | 131,1800599 | -174,9035860 |
| 22 | 22 | H | 6  | 1  | 3  | 1,0700000 | 92,1996524  | -127,4083559 |
| 23 | 23 | H | 4  | 2  | 1  | 1,0000000 | 119,6204424 | 22,6857323   |
| 24 | 24 | H | 2  | 1  | 3  | 1,0700000 | 113,8877863 | 124,0504647  |

## Structure 2

| Structure | 2   |        |    |    |    |           |             |              |
|-----------|-----|--------|----|----|----|-----------|-------------|--------------|
| Row       | Tag | Symbol | NA | NB | NC | Bond      | Angle       | Dihedral     |
| 1         | 1   | Cd     |    |    |    |           |             |              |
| 2         | 2   | C      | 1  |    |    | 3,4976113 |             |              |
| 3         | 3   | S      | 2  | 1  |    | 1,8463034 | 41,6272545  |              |
| 4         | 4   | C      | 1  | 3  | 2  | 3,5798687 | 133,3833572 | -78,1394747  |
| 5         | 5   | S      | 4  | 1  | 3  | 1,8961347 | 36,4924950  | 145,9981143  |
| 6         | 6   | C      | 1  | 5  | 4  | 3,4127772 | 104,3094700 | 65,4282678   |
| 7         | 7   | O      | 1  | 6  | 5  | 2,4180233 | 12,5914643  | -137,0176964 |
| 8         | 8   | H      | 2  | 1  | 5  | 1,1298077 | 116,9245862 | -125,6508479 |
| 9         | 9   | H      | 2  | 1  | 5  | 1,1204670 | 69,7189098  | -22,5592137  |
| 10        | 10  | H      | 4  | 1  | 5  | 1,0902230 | 139,6695033 | 7,1831264    |
| 11        | 11  | H      | 4  | 1  | 5  | 1,1417717 | 87,1967451  | 127,1774061  |
| 12        | 12  | N      | 6  | 1  | 5  | 1,4700000 | 151,0504608 | 127,0308682  |
| 13        | 13  | H      | 12 | 6  | 1  | 1,0000000 | 109,4712027 | -174,6670800 |
| 14        | 14  | H      | 12 | 6  | 1  | 1,0000000 | 109,4712028 | 5,3329199    |

|    |    |   |   |   |   |           |             |              |
|----|----|---|---|---|---|-----------|-------------|--------------|
| 15 | 15 | H | 4 | 1 | 5 | 1,0700000 | 91,7681347  | -122,9295451 |
| 16 | 16 | H | 2 | 1 | 5 | 1,0700000 | 127,9133490 | 85,7742074   |
| 17 | 17 | H | 6 | 1 | 5 | 1,0700000 | 91,7382190  | -48,0311140  |

### Structure 3

| Structure | 3   |        |    |    |    |           |             |              |
|-----------|-----|--------|----|----|----|-----------|-------------|--------------|
| Row       | Tag | Symbol | NA | NB | NC | Bond      | Angle       | Dihedral     |
| 2         | 2   | C      | 1  |    |    | 3,6715125 |             |              |
| 3         | 3   | S      | 1  | 2  |    | 2,5401536 | 29,1381134  |              |
| 4         | 4   | C      | 1  | 3  | 2  | 3,5767703 | 129,3665565 | -70,8692073  |
| 5         | 5   | S      | 1  | 4  | 3  | 2,3898345 | 28,2391694  | -152,5712930 |
| 6         | 6   | C      | 1  | 5  | 4  | 3,4482009 | 97,5297810  | 65,4431728   |
| 7         | 7   | O      | 1  | 6  | 5  | 2,5154591 | 15,3641382  | -113,6964350 |
| 8         | 8   | C      | 7  | 6  | 1  | 2,9143443 | 151,2498190 | -161,7004680 |
| 9         | 9   | O      | 1  | 7  | 6  | 2,2893956 | 69,1399050  | -169,9173864 |
| 10        | 10  | N      | 8  | 7  | 6  | 1,4314223 | 80,0812885  | -69,5855575  |
| 11        | 11  | H      | 2  | 1  | 9  | 1,1317723 | 114,9494112 | 12,3317954   |
| 12        | 12  | H      | 2  | 1  | 9  | 1,1049030 | 73,5780104  | 117,2634591  |
| 13        | 13  | H      | 4  | 1  | 9  | 1,1108739 | 137,9538485 | -44,8493899  |
| 14        | 14  | H      | 4  | 1  | 9  | 1,0768762 | 90,9228966  | 89,1674803   |
| 15        | 15  | H      | 10 | 8  | 7  | 1,0000000 | 113,2174295 | -50,4420528  |
| 16        | 16  | H      | 6  | 1  | 9  | 1,1064182 | 143,1786833 | 45,8133397   |
| 17        | 17  | H      | 4  | 1  | 9  | 1,0700000 | 92,5321834  | -163,5389941 |
| 18        | 18  | H      | 2  | 1  | 9  | 1,0700000 | 135,3277261 | -147,5647840 |
| 19        | 19  | H      | 10 | 8  | 7  | 1,0000000 | 115,7810614 | 129,5579472  |
| 20        | 20  | H      | 8  | 7  | 6  | 1,0700000 | 122,3454333 | 47,1777851   |
| 21        | 21  | N      | 6  | 1  | 9  | 1,4700000 | 91,0850720  | -155,0479431 |
| 22        | 22  | H      | 21 | 6  | 1  | 1,0000000 | 109,4712022 | 9,0914075    |
| 23        | 23  | H      | 21 | 6  | 1  | 1,0000000 | 109,4712028 | -170,9085924 |

### Structure 4

| Structure | 4   |        |    |    |    |           |            |          |
|-----------|-----|--------|----|----|----|-----------|------------|----------|
| Row       | Tag | Symbol | NA | NB | NC | Bond      | Angle      | Dihedral |
| 1         | 1   | Cd     |    |    |    |           |            |          |
| 2         | 2   | C      | 1  |    |    | 3,7350594 |            |          |
| 3         | 3   | S      | 2  | 1  |    | 1,8479866 | 36,9453954 |          |

|    |    |   |    |   |   |           |             |              |
|----|----|---|----|---|---|-----------|-------------|--------------|
| 4  | 4  | C | 1  | 3 | 2 | 3,5471045 | 146,9915082 | -63,0415671  |
| 5  | 5  | S | 4  | 1 | 3 | 1,8151228 | 38,4702600  | -132,6317750 |
| 6  | 6  | C | 1  | 5 | 4 | 3,5570699 | 79,8222178  | 150,9124636  |
| 7  | 7  | O | 1  | 6 | 5 | 2,7242840 | 16,2398866  | -153,9260360 |
| 8  | 8  | C | 7  | 6 | 1 | 2,9276714 | 126,7175914 | -94,7031595  |
| 9  | 9  | O | 1  | 7 | 6 | 2,5958208 | 70,2788245  | -136,2337348 |
| 10 | 10 | N | 8  | 7 | 6 | 1,3864929 | 91,3823028  | -90,9305927  |
| 11 | 11 | H | 2  | 1 | 5 | 1,0962302 | 125,9243837 | -175,4294074 |
| 12 | 12 | H | 2  | 1 | 5 | 1,0700000 | 55,4080087  | -115,6243201 |
| 13 | 13 | H | 4  | 1 | 5 | 1,1244160 | 101,1097109 | -111,4058248 |
| 14 | 14 | H | 4  | 1 | 5 | 1,1159544 | 141,5696749 | 9,6757952    |
| 15 | 15 | H | 10 | 8 | 7 | 1,0274051 | 120,5708303 | 95,4496042   |
| 16 | 16 | H | 8  | 7 | 6 | 1,0700000 | 109,3065444 | 23,0759313   |
| 17 | 17 | H | 10 | 8 | 7 | 1,0000000 | 118,6820021 | -58,2636857  |
| 18 | 18 | H | 2  | 1 | 5 | 1,0700000 | 116,3817585 | 27,1385953   |
| 19 | 19 | H | 4  | 1 | 5 | 1,0700000 | 89,7842544  | 136,4217722  |
| 20 | 20 | N | 6  | 1 | 5 | 1,4700000 | 156,8416087 | 85,0754826   |
| 21 | 21 | H | 20 | 6 | 1 | 1,0000000 | 109,4712026 | -136,9218564 |
| 22 | 22 | H | 20 | 6 | 1 | 0,8306589 | 121,8857948 | 60,4644215   |
| 23 | 23 | H | 6  | 1 | 5 | 1,0700000 | 85,3278797  | -38,2733263  |

### Structure 5

| Structure | 5   |        |    |    |    |           |             |              |
|-----------|-----|--------|----|----|----|-----------|-------------|--------------|
| Row       | Tag | Symbol | NA | NB | NC | Bond      | Angle       | Dihedral     |
| 1         | 1   | Cd     |    |    |    |           |             |              |
| 2         | 2   | C      | 1  |    |    | 3,3584876 |             |              |
| 3         | 3   | S      | 2  | 1  |    | 1,7862637 | 44,2233814  |              |
| 4         | 4   | C      | 1  | 3  | 2  | 3,4362671 | 156,9424626 | 63,0394512   |
| 5         | 5   | S      | 4  | 1  | 3  | 1,8654588 | 36,7238391  | -117,7078438 |
| 6         | 6   | C      | 1  | 5  | 4  | 3,5647169 | 112,1934993 | 11,8329972   |
| 7         | 7   | O      | 1  | 6  | 5  | 2,3843158 | 3,7351025   | 141,6352163  |
| 8         | 8   | N      | 6  | 1  | 5  | 1,3737735 | 136,9537578 | -125,3417670 |
| 9         | 9   | C      | 1  | 5  | 4  | 3,5847943 | 91,4762690  | -117,1978483 |
| 10        | 10  | O      | 1  | 9  | 5  | 2,5382397 | 12,6073012  | -150,0139349 |
| 11        | 11  | N      | 9  | 1  | 5  | 1,3832555 | 120,9182747 | -102,1488042 |
| 12        | 12  | H      | 2  | 1  | 5  | 1,1210913 | 85,2088234  | 42,2059427   |
| 13        | 13  | H      | 2  | 1  | 5  | 1,1242718 | 133,2319459 | 155,3686193  |
| 14        | 14  | H      | 4  | 1  | 5  | 1,1577890 | 85,0620041  | -129,0037571 |
| 15        | 15  | H      | 4  | 1  | 5  | 1,0531341 | 142,4770854 | -8,4653966   |
| 16        | 16  | H      | 8  | 6  | 1  | 1,0717041 | 116,9073834 | 175,0433829  |
| 17        | 17  | H      | 11 | 9  | 1  | 1,0000000 | 116,2319336 | 147,7640621  |

|    |    |   |    |   |   |           |             |             |
|----|----|---|----|---|---|-----------|-------------|-------------|
| 18 | 18 | H | 9  | 1 | 5 | 1,0700000 | 118,0859323 | 51,6326223  |
| 19 | 19 | H | 8  | 6 | 1 | 1,0000000 | 126,9945849 | 16,2962736  |
| 20 | 20 | H | 6  | 1 | 5 | 1,0700000 | 109,8086918 | 53,7737889  |
| 21 | 21 | H | 2  | 1 | 5 | 1,0700000 | 106,4672609 | -66,9018840 |
| 22 | 22 | H | 4  | 1 | 5 | 1,0700000 | 98,5478624  | 123,2335225 |
| 23 | 23 | H | 11 | 9 | 1 | 1,0000000 | 121,3933650 | -35,3565268 |

### Structure 6

| Structure | 6   |        |    |    |    |           |             |              |
|-----------|-----|--------|----|----|----|-----------|-------------|--------------|
| Row       | Tag | Symbol | NA | NB | NC | Bond      | Angle       | Dihedral     |
| 1         | 1   | Cd     |    |    |    |           |             |              |
| 2         | 2   | C      | 1  |    |    | 3,2391686 |             |              |
| 3         | 3   | S      | 2  | 1  |    | 1,8496005 | 47,1229894  |              |
| 4         | 4   | C      | 1  | 3  | 2  | 3,3779621 | 152,7187992 | 72,6581906   |
| 5         | 5   | S      | 4  | 1  | 3  | 1,8198745 | 43,0983436  | -120,8282338 |
| 6         | 6   | C      | 1  | 5  | 4  | 3,3457699 | 115,6160280 | -2,9670864   |
| 7         | 7   | O      | 1  | 6  | 5  | 2,4078679 | 15,9560581  | 64,0881540   |
| 8         | 8   | N      | 6  | 1  | 5  | 1,3574127 | 136,9591460 | -141,7955849 |
| 9         | 9   | C      | 5  | 4  | 1  | 3,8509864 | 144,7291155 | -88,5869292  |
| 10        | 10  | O      | 1  | 5  | 4  | 2,8153391 | 73,5298844  | -141,7729445 |
| 11        | 11  | N      | 9  | 5  | 4  | 1,3751978 | 130,4160915 | -164,0270275 |
| 12        | 12  | H      | 2  | 1  | 5  | 1,0928347 | 70,8600476  | 34,7885543   |
| 13        | 13  | H      | 2  | 1  | 5  | 1,0999719 | 139,2835370 | 116,9604625  |
| 14        | 14  | H      | 4  | 1  | 5  | 1,1424089 | 92,3870810  | -116,4103282 |
| 15        | 15  | H      | 4  | 1  | 5  | 1,0658468 | 146,6915833 | 13,2459485   |
| 16        | 16  | H      | 8  | 6  | 1  | 1,0089137 | 118,6497986 | -122,4642673 |
| 17        | 17  | H      | 11 | 9  | 5  | 1,0425964 | 108,4231743 | 104,1646795  |
| 18        | 18  | H      | 4  | 1  | 5  | 1,0700000 | 94,0992718  | 132,9425188  |
| 19        | 19  | H      | 6  | 1  | 5  | 1,0700000 | 106,0670838 | 70,6473576   |
| 20        | 20  | H      | 8  | 6  | 1  | 1,0000000 | 128,6944073 | 49,6309715   |
| 21        | 21  | H      | 9  | 5  | 4  | 1,0700000 | 104,0874010 | -31,5649105  |
| 22        | 22  | H      | 2  | 1  | 5  | 1,0700000 | 114,0389390 | -72,9277595  |
| 23        | 23  | H      | 11 | 9  | 5  | 1,0000000 | 129,1216605 | -51,4142045  |

### Structure 7

| Structure | 7   |        |    |    |    |           |       |          |
|-----------|-----|--------|----|----|----|-----------|-------|----------|
| Row       | Tag | Symbol | NA | NB | NC | Bond      | Angle | Dihedral |
| 1         | 1   | Cd     |    |    |    |           |       |          |
| 2         | 2   | C      | 1  |    |    | 3,3495534 |       |          |



|    |    |   |    |   |   |           |             |              |
|----|----|---|----|---|---|-----------|-------------|--------------|
| 3  | 3  | O | 1  | 2 |   | 2,3309809 | 13,8587813  |              |
| 4  | 4  | C | 3  | 2 | 1 | 3,0552115 | 121,7736775 | -109,8134140 |
| 5  | 5  | O | 1  | 3 | 2 | 2,4056964 | 71,3300184  | -131,8064483 |
| 6  | 6  | N | 4  | 3 | 2 | 1,3531739 | 94,0248159  | -80,0800670  |
| 7  | 7  | H | 6  | 4 | 3 | 1,0222893 | 116,8910734 | 123,3595505  |
| 8  | 8  | C | 1  | 3 | 2 | 3,4285571 | 125,1189854 | 137,1794531  |
| 9  | 9  | S | 8  | 1 | 3 | 1,9180055 | 45,6129459  | 1,2783649    |
| 10 | 10 | H | 8  | 1 | 3 | 1,0982366 | 123,1051870 | 82,9741415   |
| 11 | 11 | H | 8  | 1 | 3 | 1,0608695 | 64,0419398  | 177,3208275  |
| 12 | 12 | C | 1  | 3 | 2 | 3,3860029 | 95,5293844  | -15,8543002  |
| 13 | 13 | S | 12 | 1 | 3 | 1,8026839 | 41,0995492  | -136,3351883 |
| 14 | 14 | H | 12 | 1 | 3 | 1,0981114 | 147,5836129 | -112,9413814 |
| 15 | 15 | H | 12 | 1 | 3 | 1,1463288 | 88,1562404  | 1,3341690    |
| 16 | 16 | O | 1  | 3 | 2 | 2,5819638 | 98,2131087  | 60,5821143   |
| 17 | 17 | H | 16 | 1 | 3 | 0,9488369 | 99,1010097  | 162,5190779  |
| 18 | 18 | H | 16 | 1 | 3 | 0,9081761 | 153,2044464 | 31,3807695   |
| 19 | 19 | H | 12 | 1 | 3 | 1,0700000 | 91,7040673  | 114,4840463  |
| 20 | 20 | H | 8  | 1 | 3 | 1,0700000 | 126,7549238 | -83,4083152  |
| 21 | 21 | H | 6  | 4 | 3 | 1,0000000 | 127,9373263 | -68,7488900  |
| 22 | 22 | H | 4  | 3 | 2 | 1,0700000 | 119,8304936 | 34,8169139   |
| 23 | 23 | N | 2  | 1 | 3 | 1,4700000 | 145,0073669 | -11,8620517  |
| 24 | 24 | H | 23 | 2 | 1 | 1,0211803 | 129,3356481 | -173,8815919 |
| 25 | 25 | H | 23 | 2 | 1 | 1,0211803 | 115,8072519 | 6,1184069    |
| 27 | 27 | H | 2  | 1 | 3 | 1,0700000 | 93,7704638  | 167,6345526  |
